# Supplementary material for: Recognition and response to life-threatening situations among women with perinatal mental illness: a qualitative study
Source: PubMed Central journal article supplement — BMJ Open. 2019 Mar 20;9(3):e025872. doi: 10.1136/bmjopen-2018-025872 (PMC6475171; doi:10.1136/bmjopen-2018-025872), 2019-03-20
Supplement: bmjopen-2018-025872.draft_revisions.pdf [file bmjopen-2018-025872.draft_revisions.pdf]

# BMJ Open

BMJ Open is committed to open peer review. As part of this commitment we make the peer review history of every article we publish publicly available.

When an article is published we post the peer reviewers' comments and the authors' responses online. We also post the versions of the paper that were used during peer review. These are the versions that the peer review comments apply to.

The versions of the paper that follow are the versions that were submitted during the peer review process. They are not the versions of record or the final published versions. They should not be cited or distributed as the published version of this manuscript.

BMJ Open is an open access journal and the full, final, typeset and author-corrected version of record of the manuscript is available on our site with no access controls, subscription charges or pay-per-view fees (<http://bmjopen.bmj.com>).

If you have any questions on BMJ Open's open peer review process please email [editorial.bmjopen@bmj.com](mailto:editorial.bmjopen@bmj.com)

# BMJ Open

## Recognition and response to life-threatening situations in women with perinatal mental illness: A qualitative study

|                               |                                                                                                                                                                                                                                                                                                                      |
|-------------------------------|----------------------------------------------------------------------------------------------------------------------------------------------------------------------------------------------------------------------------------------------------------------------------------------------------------------------|
| Journal:                      | <i>BMJ Open</i>                                                                                                                                                                                                                                                                                                      |
| Manuscript ID                 | bmjopen-2018-025872                                                                                                                                                                                                                                                                                                  |
| Article Type:                 | Research                                                                                                                                                                                                                                                                                                             |
| Date Submitted by the Author: | 06-Aug-2018                                                                                                                                                                                                                                                                                                          |
| Complete List of Authors:     | Easter, Abigail; King's College London, Institute of Psychiatry, Psychology and Neuroscience, Health Service and Population Research Department<br>Howard, Louise; institute of psychiatry, health service and population research<br>Sandall, Jane; Kings College, London, Health and Social Care Research Division |
| Keywords:                     | QUALITATIVE RESEARCH, Perinatal Mental Health, MENTAL HEALTH, Maternal Mortality, Near Miss                                                                                                                                                                                                                          |
|                               |                                                                                                                                                                                                                                                                                                                      |

SCHOLARONE™  
Manuscripts

Peer Review Only

1  
2  
3 **Recognition and response to life-threatening situations in women with perinatal mental illness: A**  
4  
5 **qualitative study**

6  
7  
8 A. Easter,<sup>1</sup> L.M Howard,<sup>2</sup> J. Sandall<sup>3</sup>  
9

- 10  
11  
12  
13 1. King's Improvement Science, Health Service Research and Population Department, Institute  
14 of Psychiatry, Psychology and Neuroscience, King's College London, London, UK  
15  
16 2. Section of Women's Mental Health, Health Service Research and Population Department,  
17 Institute of Psychiatry, Psychology and Neuroscience, King's College London, London, UK  
18  
19 3. Department of Women and Children's Health, King's College London, St Thomas' Hospital,  
20 London, UK  
21  
22  
23  
24  
25  
26  
27  
28  
29

30 **Correspondence to Dr Abigail Easter**

31  
32 Address: King's Improvement Science, Health Service Research and Population Department, Institute  
33 of Psychiatry, Psychology and Neuroscience, King's College London, PO25, David Goldberg Centre,  
34 De Crespigny Park, London, SE5 8AF  
35  
36

37  
38 Email: abigail.easter@kcl.ac.uk  
39

40  
41 Telephone: 020 7 848 5548  
42  
43  
44  
45  
46  
47  
48  
49  
50  
51  
52  
53  
54  
55  
56  
57  
58  
59  
60

## Life-threatening situations in women with perinatal mental illness

**Abstract**

**Objective:** Mental illness has persistently been found to be a leading cause of death during pregnancy and the year after birth (the perinatal period). This study aims to explore barriers to detection, response and escalation of mental health related life-threatening near miss events among women with perinatal mental illness.

**Design:** Qualitative study

**Participants:** Healthcare professionals (HCP) working in psychiatry, maternity and primary care (n=15) across community and hospital maternity and perinatal services within the UK.

**Methods:** In-depth semi-structured interviews were conducted with a range of healthcare professionals working with women during the perinatal period. Inductive thematic analysis was employed to analyse the data.

**Results:** Three overarching themes were identified: Recognition of Severity, Communication of Risk, and Service Provision and Access to Treatment. Differing perspectives of mental illness severity influenced how life-threatening situations among women with perinatal mental illness were described, recognised and communicated between teams. Under-resourced mental health service provision, particularly within emergency and specialist perinatal mental health services, unclear thresholds for escalating care and poor infrastructure for sharing information all contributed to delays in a timely response to crisis situations. Reluctance to prescribe medication or admit women to psychiatric hospital, stigma, and missed appointments created further delays.

**Conclusions:** Several complex and inter-related healthcare barriers to detection, response and escalation of care for potentially life-threatening situations among women with perinatal mental illness exist. Focusing on how differences in organisational and professional culture contribute to the recognition of severe mental illness and inter-disciplinary communication may help facilitate clearer co-ordination between teams.

**Strengths and Limitations of the study**

- This is the first study to explore maternal near misses among women with a range of perinatal mental illnesses, which identifies several important barriers to detection & response of life-threatening situations among women with perinatal mental illness.
- As a small explorative qualitative study of healthcare professionals in the UK the study findings may not be generalizable to other settings.
- Women's perspectives are not explored within this study.

**Key words:** Qualitative, Perinatal Mental Health, Maternal Mortality, Near Miss, Patient Safety

## Introduction

Mental illness is common during pregnancy and the first year postpartum (the perinatal period), with major depression or anxiety affecting approximately 10% of women.<sup>(1)</sup> Recent confidential enquiries in the UK suggest that approximately 1 in 5 women who died had a mental illness and 1 in 7 women died from suicide.<sup>(2, 3)</sup> A near miss approach can be a valuable method for studying the processes in place for recognising and responding to clinical deterioration, and has been widely adopted to study severe maternal morbidity.<sup>(4, 5)</sup> A maternal near miss is typically defined as 'severe life-threatening complications not resulting in death'.<sup>(5)</sup> Several tools for identifying maternal near misses exist,<sup>(4, 6, 7)</sup> yet despite the high mortality in perinatal period relating to mental rather than physical health they focus almost entirely on clinical indicators of physical health with limited consideration of mental health.<sup>(8)</sup>

This represents a significant research gap, since current approaches to investigating maternal morbidity and mortality rely upon identifying preceding clinical characteristics associated with a worsening of condition. Developing strategies to identify women at risk of life-threatening mental illness is therefore of clear clinical importance in order to ensure that timely and appropriate intervention are available to those at greatest risk.

The purpose of this study is to explore potential barriers to detection, response and escalation of mental health related life-threatening events among women with perinatal mental illness.

## Methods

### *Design*

Given the absence of prior empirical research into psychiatric maternal near miss events, this study employs a qualitative research design utilising in-depth semi-structured interviews with healthcare professionals (HCP).

### *Participants and Setting*

This UK based study aimed to recruit a sample of HCP working with women with mental illness during the perinatal period (i.e. during pregnancy and up to the first-year post birth). Purposeful and convenience sampling were used to recruit a national sample of HCP from different healthcare disciplines (e.g. Psychiatry, Psychology, Midwifery, Obstetrics, and Health Visiting), across a range of healthcare settings (e.g. inpatient, outpatient and community teams). Rigour and transferability were optimised by sampling respondents with differing characteristics.

Two main recruitment methods were utilised: direct emails to professional mailing lists and promotion of the study to professional groups via social media. Interested participants received an information sheet and were offered the opportunity to discuss the study; those agreeing to participate provided written informed consent prior to the interview. Recruitment to the study was concurrent with data analysis, and data collection proceeded until no further unique themes were identified in successive interviews (saturation). Although there is no agreed method for establishing data saturation, after 15 interviews a range of HCP experiences had been captured, no new themes were emerging and data saturation was reached.

### *Data Collection*

Interviews were semi-structured and followed a topic guide. Questions were open-ended and iteratively revised following initial interviews to allow further exploration of the issues raised. Due to differing definitions of near misses across different disciplines, following a brief exploration of what HCP thought of as a psychiatric near miss event, they were directed to focus on situations that they thought were life-threatening to the service user involved. All interviews were undertaken by one researcher (AE), by phone or face to face. Interviews were audio recorded and transcribed verbatim.

## Life-threatening situations in women with perinatal mental illness

*Data Analysis*

Data were managed using qualitative software, NVIVO V.11. Inductive thematic analysis, as described by Braun and Clarke was used to identify common themes in the data.<sup>(9)</sup> AE read the transcripts several times to become immersed in the data. Text relating to barriers to detection, response and escalation of potential life-threatening psychiatric events among women with perinatal mental illness was extracted. Initial line-by-line coding was conducted, before grouping meaningful sub-themes into overarching themes. The emerging themes were used to modify the interview schedule and inform subsequent interviews and analysis. Data analysis and interpretation was informed by Systems Theories of healthcare,<sup>(10)</sup> and the 'Three Delays Model' maternal mortality,<sup>(11, 12)</sup> to facilitate exploration of barriers and delays at different levels of the healthcare system and within a women's care pathway, and focused on differing perceptions between HCP and teams.

All authors discussed the initial coding framework and emerging themes to ensure that alternative viewpoints had been considered, reviewed the thematic labels applied and agree on the final overarching and sub-themes. This process helped to highlight alternative interpretations, which were reflective of the different academic and clinical background (maternity, psychiatry and psychology) of the research team.

**Patient and Public Involvement**

Feedback on the preliminary findings from the thematic analysis was sought from a patient and public involvement group consisting of women, and family members, with lived experience of perinatal mental illness.



## Results

### *Participants*

A total of 15 HCP participated in the current study, participant characteristics are shown in Table 1.

**Table 1: Characteristics of Interview Participants**

| Participant Number | Gender | Profession           | Setting                                  |
|--------------------|--------|----------------------|------------------------------------------|
| 01                 | F      | Psychiatrist         | Community Perinatal Psychiatry           |
| 02                 | M      | Psychiatrist         | Adult Psychiatry                         |
| 03                 | M      | Psychiatrist         | Inpatient Mother and Baby Hospital       |
| 04                 | F      | Midwife              | Community Midwifery                      |
| 05                 | F      | Psychiatrist         | Inpatient/Community Perinatal Psychiatry |
| 06                 | F      | General Practitioner | General Practice                         |
| 07                 | F      | Midwifery            | Community Midwifery/Maternity Hospital   |
| 08                 | F      | Health Visitor       | Community Health Visiting/Management     |
| 09                 | F      | Psychologist         | Outpatients Clinic                       |
| 10                 | F      | Midwife              | Community Midwifery/Management           |
| 11                 | F      | Psychiatrist         | Community Perinatal Psychiatry           |
| 12                 | F      | Obstetrician         | Maternity Hospital                       |
| 13                 | F      | Health Visiting      | Community Health Visiting                |
| 14                 | F      | Midwifery            | Community Midwifery/Maternity Hospital   |
| 15                 | F      | Midwifery            | Community Midwifery                      |

## Life-threatening situations in women with perinatal mental illness

*Inconsistent Definitions and Criteria*

There was considerable inconsistency in how HCP conceptualised a maternal near miss or life-threatening event relating to mental health, which was driven by different definitions in use across the specialisms. The most typical examples were attempted suicides, although self-harm, harm to others and severe mental health relapses were also discussed.

As depicted in Figure 1, barriers to identifying and responding to a potentially life-threatening event in mental health occurred at three levels of the healthcare system: Recognition of Severity, Communication of Risk and Service Provision and Access to Treatment.

**Figure 1 here**

**1. Recognition of Severity***Differing Perceptions of Risk*

A primary requisite to providing appropriate and timely mental health treatment is the ability to accurately determine the severity of a woman's symptoms and level of risk. However, differing perception of risk and illness severity across healthcare disciplines acted as a key barrier. This impacted on detection and response to potentially life-threatening situations in two ways. Perinatal Psychiatrists described situations where they felt that primary HCP and general psychiatry teams had underestimated the level of risk of a situation, which contributed to delays in accessing specialist care.

*"...she was someone who in the first two weeks postnatally she'd been referred to the CMHT [Community Mental Health Team] ... but, because she wasn't referred urgently (the GP was just a bit concerned) and she was sent an appointment, but by that time she'd already jumped [off a high building ...but survived]." (Perinatal Psychiatrist)*

## Life-threatening situations in women with perinatal mental illness

1  
2  
3 By comparison, primary HCP frequently expressed difficulties escalating care for women that they  
4 perceived to be at risk of a life-threatening event when their concerns were not shared by mental  
5 health teams. This was most often described within the context of self-harm and created uncertainty  
6 about whether self-harm represented a risk of a more life-threatening injury and frustration about a  
7 lack of prioritisation of such cases.  
8  
9  
10  
11  
12

13  
14 *"Maybe in their world of mental health it's not so bad. Obviously for me, from my perspective we've*  
15 *got a woman who is doing that [harming] to herself and God knows what else she could do"*

16  
17  
18 *(Midwife)*  
19

20  
21 *Fluctuations in Mental Illness*  
22

23 Unlike many physical illnesses, which typically have a more linear deterioration prior to a maternal  
24 near miss, symptoms of mental illness and levels of risk can fluctuate over time, sometimes very  
25 rapidly.<sup>(13)</sup> Fluctuation in symptom severity was identified as a fundamental challenge when trying  
26 to identify women at risk of life-threatening event before it occurred.  
27  
28  
29  
30

31  
32 *"...so in actual fact we assessed her as being relatively low risk but ... she had just had a visit from*  
33 *her family which had been quite a distressing visit which had obviously changed the risk... In*  
34 *retrospect we didn't respond appropriately to that."* *(Perinatal Psychiatrist)*  
35  
36  
37  
38

39 Midwives and Health Visitors highlighted that this lack of regular enquiry about a woman's mental  
40 health status throughout the perinatal period also created barriers to recognising signs of  
41 deterioration. Competing role demands sometimes meant that a woman's mental health or  
42 wellbeing may not be asked about at each visit unless there was cause for concern. This was  
43 compounded by a lack of continuity of care, resulting in midwives being less able to detect changes  
44 in a woman's mental health.  
45  
46  
47  
48  
49  
50  
51  
52  
53  
54  
55  
56  
57  
58  
59  
60

## Life-threatening situations in women with perinatal mental illness

1  
2  
3 *"...it's based on booking, so unless the woman actually comes back and says, "Do you know what?*  
4 *I'm not feeling very well, I'm not doing very well," it won't be necessarily revisited again during*  
5 *pregnancy and also postnatally. "(Midwife)*

### *Risk Assessment Tools*

10  
11  
12 Although HCP described tools available to assess a women's risk or symptom severity, it was  
13  
14 apparent that these tools were not reliable or regularly implemented. In some cases this led to  
15  
16 disagreements among clinicians about the level of risk woman was presenting with, and contributed  
17  
18 to difficulties in communicating risk between teams.  
19  
20

21  
22 *"...we really just use a standard clinical interview really to find out what they are telling us and what*  
23 *we work out from psychiatric examination to tell us how risky they actually are. There isn't really a*  
24 *standardized tool which works, I don't think." (Psychiatrist)*

## **2. Communication of Risk**

30  
31  
32 During the perinatal period a range of HCP are involved in a women's care, communication within  
33  
34 and between teams is therefore paramount to recognising and responding to high risk situations,  
35  
36 however several communication barriers were identified.  
37  
38

### *Differing Professional Languages*

39  
40  
41  
42 Health Visitors and Midwives spoke about difficulties communicating symptoms and deterioration of  
43  
44 mental illness to mental health teams, commenting that it felt as if they 'spoke different languages'.  
45  
46 Primary care staff felt that their training and professional background did not adequately equip them  
47  
48 to convey concerns about a mothers' mental health or accurately describe particular symptoms. In  
49  
50 some cases this resulted in several re-referrals to mental health services, potentially creating delays  
51  
52 to receiving care.  
53  
54  
55  
56  
57

## Life-threatening situations in women with perinatal mental illness

1  
2  
3 *"...what I used to find is that health visitors would have an issue, a concern, and ring the mental*  
4 *health services, but because they weren't really clear about what they were saying or what they were*  
5 *doing so they would say, "Well, it wasn't accepted." I'd say, 'Right, ring back and say this [...] and*  
6 *give them the language. And then once you did that, the referral was accepted. It's something about*  
7 *the language and the culture that each profession uses as well that makes it more likely that a*  
8 *woman will be seen appropriately." (Health Visitor)*

9  
10  
11  
12  
13  
14  
15  
16 This appeared to be compounded by a lack of confidence among junior primary care staff about  
17 communicating with specialist mental health teams in relation to illnesses outside of their discipline,  
18 whereas support from senior staff helped facilitate these conversations.  
19  
20  
21

#### 22 *Unclear Referral Thresholds*

23  
24  
25  
26 During the perinatal period clinical guidance in the UK recommends a lower threshold for referral  
27 and intervention for mental illness.<sup>(14)</sup> However, healthcare professionals often described a sense of  
28 confusion and frustration about what symptoms would constitute a referral being accepted by  
29 secondary mental health teams. This was strongly related to themes of differing perceptions of  
30 severity between specialisms and difficulties communicating levels of risk in referral forms. Midwives  
31 and Health Visitors often felt that thresholds for secondary mental health services were too high,  
32 which led to referrals not being accepted and left primary healthcare professionals unsure of how to  
33 manage the mental healthcare of such women.  
34  
35  
36  
37  
38  
39  
40  
41  
42  
43

44 *"...we are working very much and saying if they have got these pre-existing conditions that the*  
45 *referral needs to go in and it needs to bypass the lower level of support. It needs to go straight*  
46 *through to the secondary levels so that the Perinatal Team will pick it up. But it's just very difficult to*  
47 *write the referral so that you can get it through to meet those thresholds." (Midwife)*

48  
49  
50  
51  
52  
53 By comparison, Psychiatrists sometimes expressed frustration in the number of 'inappropriate'  
54 referrals to mental health services, which they had limited capacity to manage.  
55  
56  
57

## Life-threatening situations in women with perinatal mental illness

1  
2  
3           *“On the referral form, we've got risk assessments, suicide risk or self-harm, we particularly*  
4 *highlighted them you could see that. The problem is ... we've had women who've taken an overdose*  
5 *10 years ago and then the nurses, the midwives read that and they put the highest score for suicide*  
6 *risk and actually it's very historical.” (Psychiatrist)*  
7  
8  
9

### 10 11           *Poor Information Sharing and Fragmented Services*

12  
13  
14  
15 The ability to communicate risks and concerns between different health and social care  
16 professionals involved in a women's care was also impacted by a lack of integrated clinical records.  
17  
18 HCP often spoke about managing the care of a woman but not being fully aware of involvement  
19 from other services, sometimes having to rely upon women to provide information about their care.  
20  
21

22  
23  
24           *“I find that because we all have different IT systems where we keep our records, nothing speaks to*  
25 *each other; we don't have access to each other's records [...] I think that there are issues with that*  
26 *about the fact we can't see what Mental Health have written, Mental Health can't see what we're*  
27 *writing, Social Care can't see what any of us are writing.” (Midwife)*  
28  
29  
30  
31

### 32 33 **3. Service Provision and Access to Treatment**

#### 34 35           *Lack of Resources*

36  
37  
38  
39 A key theme from all interviews that contributed to missed opportunities for care among women  
40 with potentially life-threatening illnesses was a lack of resources for mental health service provision,  
41 which affected the capacity for response to high risk situations. In addition, a lack of appropriate  
42 mental health emergency and crisis care services resulted in a deficiency of rapid response in the  
43 community. Several HCP viewed Accident and Emergency Departments (A&E) as inappropriate  
44 facilities for a mental health crisis, particularly during pregnancy, and highlighted women's  
45 reluctance to attend A&E for their mental health.  
46  
47  
48  
49  
50  
51  
52  
53  
54  
55  
56  
57  
58  
59  
60

## Life-threatening situations in women with perinatal mental illness

1  
2  
3 *"In terms of getting the crisis team to attend or getting the GP to attend out of hours has always*  
4 *been... well a bit fraught really and not knowing who to ring for the best and the crisis team saying,*  
5 *"Yes, can send someone but it's going to be six hours, which isn't exactly considered a crisis." (Health*  
6  
7 *Visitor)*

*Medication Reluctance*

11  
12  
13  
14  
15 It was apparent from some interviews that a reluctance to prescribe psychotropic medication or to  
16 recommend an inpatient admission during the perinatal period was also a factor. Other interviews  
17 emphasised the role of the women and families in deciding to stop medication during the perinatal  
18 period which was felt to contribute to deterioration in mental health.  
19  
20  
21  
22

23  
24 *"Sometimes there is sort of a resistance from psychiatry services to up medication and be*  
25 *more aggressive with it so that you can actually try and sort out the medical problem."*

26  
27  
28 *(Obstetrician)*

*Missed Appointments*

29  
30  
31  
32  
33  
34 HCP also spoke about how a perceived stigma and fear of social service involvement led to women  
35 *"masking their symptoms"* from clinical staff or not attending clinical appointments, which created  
36 additional difficulties in spotting early warning signs.  
37  
38  
39  
40

41 *"It's the woman who don't attend or don't disclose, I think they're most at risk groups [...]"*

42  
43 *The women that I do see in the clinic are the ones at least I'm worried about, it's those I'm*  
44 *not seeing are the ones I'm most worried about." (Psychiatrist)*

*Poor Role Clarity*

45  
46  
47  
48  
49  
50  
51  
52  
53  
54 Several HCP also highlighted that poor role clarity was also a factor that contributed to women  
55 deemed at risk of a life-threatening event not receiving an appropriate level of treatment. This was  
56  
57

## Life-threatening situations in women with perinatal mental illness

1  
2  
3 particularly the case in situations where a woman was currently well, but at high risk of relapse or  
4  
5 severe mental illness in the postpartum, which created confusion over whose role it was to monitor  
6  
7 the well-being of a woman and escalate care if necessary.  
8  
9

10 *“She doesn’t get accepted (for mental health treatment) and then the response from perinatal is for*  
11 *the midwife to monitor and the GP to monitor. I came back and said, “There’s (so few) midwives in*  
12 *the team, and what exactly is this midwife, who is a midwife, monitoring? What exactly do want her*  
13 *to monitor? Secondly, what is this about the GP? Don’t we understand how GP’s work?” Monitor*  
14 *what? [...] “What do you mean monitor?” Midwives are there to monitor the pregnancy, but we are*  
15 *not mental health nurses, we are not psychiatrists.” (Midwife)*  
16  
17  
18  
19  
20  
21  
22

23 Psychiatrists describe discharging women to the primary care staff who did not meet the threshold  
24  
25 for specialist mental health services, but required closer monitoring and support. However, primary  
26  
27 care staff often expressed feeling unclear or ill-equipped in their role and how to monitor the mental  
28  
29 healthcare of these women. Some midwives perceived the mental health of the women they were  
30  
31 managing to be too severe or high risk and warranted greater support from mental health  
32  
33 specialists; highlighting a lack of middle tier mental health services to monitor and support women  
34  
35 who may be at risk of deterioration.  
36  
37  
38

### 39 Discussion

40  
41 Accurate identification and treatment of mental illnesses that may become life threatening during  
42  
43 the perinatal period is an important quality and safety issue and crucial to reducing the maternal  
44  
45 death rate.<sup>(2, 15)</sup> This study illustrates several inter-related barriers to detection, response and  
46  
47 escalation of mental health care in potentially life-threatening situations. Differing perceptions of  
48  
49 risk and severity of mental illness between the various HCP involved in a woman’s perinatal care had  
50  
51 significant consequences for how situations were interpreted and communicated between teams. In  
52  
53 many cases, these barriers to communication were further compounded by a perception of a lack of  
54  
55  
56  
57  
58  
59  
60



## Life-threatening situations in women with perinatal mental illness

1  
2  
3 reliable tools to assess risk, unclear thresholds for escalating care and poor infrastructure for sharing  
4  
5 information.

6  
7  
8 These findings are consistent with recent maternal deaths enquiries which have found poor  
9  
10 communication between maternity and mental health services to be a significant factor in many of  
11  
12 the mental health related deaths.<sup>(16)</sup> Healthcare communication is a complex process and this study  
13  
14 emphasises the important influence of how signs of mental illness are interpreted and  
15  
16 communicated, which was strongly embedded within HCP training and experiences, confidence and  
17  
18 professional cultures. In order to improve communication between primary and mental healthcare  
19  
20 professionals there is a clear need to adopt strategies that target such cultural factors and help  
21  
22 facilitate communication between teams.  
23

24  
25 Under-resourced mental health service provision further contributed to women not being assessed  
26  
27 by a specialist within an adequate time-frame. A shortage of services for moderate mental illness  
28  
29 led to primary care staff monitoring and managing the care of women they perceived to require  
30  
31 greater support, creating confusion about referral thresholds. Lack of perinatal mental health  
32  
33 services in the UK is well-documented,<sup>(17)</sup> and recent government investments aim to increase access  
34  
35 by 30,000 women by 2021.<sup>(18)</sup> However, In addition to a lack of specialist services, HCP emphasised  
36  
37 several other barriers, which included both healthcare level factors (e.g. a reluctance to prescribe  
38  
39 medication or admit women to mental health hospitals during pregnancy or early post-birth) and  
40  
41 patient and family level factors (e.g. stigma and missed appointments).  
42  
43  
44

45 This is the first study to explore maternal near misses or life-threatening situations among women  
46  
47 with perinatal mental illnesses. Interviews with a range of professionals involved in women's  
48  
49 antenatal and postnatal care allowed us to compare the views of different HCP and the impact that  
50  
51 this had on recognition and response. Although several previous studies have explored experiences  
52  
53 of care among women with perinatal mental illness,<sup>(19-21)</sup> none have distinguished between women  
54  
55 with high-risk mental illness, requiring rapid assessment and escalation and those with mild-  
56  
57

## Life-threatening situations in women with perinatal mental illness

1  
2  
3 moderate mental illness. This is important since differing levels of risk and severity require different  
4  
5 communication strategies and treatment response. Failure to objectively differentiate between  
6  
7 levels of risk and severity in mental health literature is likely to further compound the challenges  
8  
9 highlighted in this study.

10  
11  
12 However, there are some study limitations that require consideration. This is a small qualitative  
13  
14 study of HCP in the UK, which may not be generalizable to other settings. Importantly, women's  
15  
16 perspectives are not explored within this study. Given the sensitivity nature of the topic, future  
17  
18 research will be co-designed with women, and families, with experience of mental illness to adopt  
19  
20 appropriate and sensitive research methods.

21  
22  
23 Furthermore, the utility and applicability of the concept of clinical deterioration within the context of  
24  
25 psychiatric near miss events requires some consideration, since not all psychiatric maternal near  
26  
27 misses will occur within the context of clinical deterioration. As highlighted by several healthcare  
28  
29 professionals, an absence of reliable and dynamic methods of risk assessment impeded their ability  
30  
31 to predict those at most risk of a life-threatening event. This is supported by a recent meta-analysis  
32  
33 of risk scales, which demonstrated the predictive power of such scales on future suicidal behaviours  
34  
35 was too low to advocate their use.<sup>(22)</sup> Instead, a focus on individual needs based assessments and  
36  
37 modifiable risk factors is recommended.<sup>(22, 23)</sup>

38  
39  
40  
41 In conclusion, barriers to response and escalation of mental healthcare for women life-threatening  
42  
43 perinatal mental illness are strongly influenced by the professional culture and understanding of  
44  
45 mental illness embedded within different healthcare disciplines. A lack of consensus about what  
46  
47 constitutes a psychiatric maternal near miss resulted in discrepancies in reporting, recording and  
48  
49 learning from such events. To prevent future tragedies, there is a need for greater clarity and  
50  
51 consensus about thresholds for referral to secondary mental health services and the role of  
52  
53 Midwives and Health Visitors in monitoring women's mental health during the perinatal period.

54  
55  
56 Focusing on how differences in organisational and professional culture contribute to the recognition  
57

1  
2  
3 of severe mental illness and inter-disciplinary communication may help facilitate clearer co-  
4  
5 ordination between teams in the future.  
6  
7  
8  
9

10 **Funding:** Dr Easter is funded through a King's Improvement Science Fellowship award. King's  
11  
12 Improvement Science is part of the NIHR CLAHRC South London and comprises a specialist team of  
13  
14 improvement scientists and senior researchers based at King's College London. Its work is funded by  
15  
16 King's Health Partners (Guy's and St Thomas' NHS Foundation Trust, King's College Hospital NHS  
17  
18 Foundation Trust, King's College London and South London and Maudsley NHS Foundation Trust),  
19  
20 Guy's and St Thomas' Charity, the Maudsley Charity and the Health Foundation. Prof Howard is  
21  
22 funded through a NIHR Research Professorship (NIHR-RP-R3-12-011) in Maternal Mental Health. Prof  
23  
24 Sandall CBE is an NIHR Senior Investigator. Dr Easter and Prof Sandall are supported by the National  
25  
26 Institute for Health Research (NIHR) Collaboration for Leadership in Applied Health Research and  
27  
28 Care South London at King's College Hospital NHS Foundation Trust. The views expressed are those  
29  
30 of the author(s) and not necessarily those of the NHS, the NIHR or the Department of Health.  
31  
32  
33

34 **Acknowledgements:** We would like to thank all healthcare professionals for dedicating their time to  
35  
36 this study and the Section of Women's Mental Health Perinatal Service User Advisory Group for their  
37  
38 contribution to this study.  
39  
40

41 **Competing Interests:** None  
42  
43

44 **Contribution to Authorship:** AE, LH and JS conceived and designed the current study. AE was  
45  
46 responsible for all data collection and primary data analysis; AE, LH and JS contributed to data  
47  
48 interpretation. AE drafted the article which was critically revised by all authors. All authors approved  
49  
50 the final version of the article to be published.  
51  
52  
53  
54  
55  
56  
57  
58  
59  
60

## Life-threatening situations in women with perinatal mental illness

1  
2  
3 **Ethical Approval:** This study was reviewed and approved by King's College London Ethics Committee  
4 (Psychiatry, Nursing and Midwifery Research Ethics Subcommittee); Research Ethics Committee  
5 Reference LRS-16/17-3861 approval granted 12/12/16.  
6  
7  
8  
9

10 **Data sharing statement:** This is a qualitative study and therefore the data generated is not suitable  
11 for sharing beyond that contained within the report. Further information can be obtained from the  
12 corresponding author.  
13  
14  
15

## 16 **References**

- 17  
18  
19  
20 1. Howard LM, Molyneaux E, Dennis C-L, Rochat T, Stein A, Milgrom J. Non-psychotic mental  
21 disorders in the perinatal period. *The Lancet*. 2014;384(9956):1775-88.  
22  
23  
24 2. Knight M NM, Tuffnell D, Kenyon S, Shakespeare J, Brocklehurst P, Kurinczuk JJ Oxford:  
25 National Perinatal Epidemiology Unit, University of Oxford 2016. Saving Lives, Improving Mothers'  
26 Care - Surveillance of maternal deaths in the UK 2012-14 and lessons learned to inform maternity  
27 care from the UK and Ireland Confidential Enquiries into Maternal Deaths and Morbidity 2009-14.  
28 2015.  
29  
30  
31  
32  
33  
34 3. Knight M, Nair M, Tuffnell D, Shakespeare J, Kenyon S, Kurinczuk J. Saving Lives, Improving  
35 Mothers' Care Lessons learned to inform future maternity care from the UK and Ireland Confidential  
36 Enquiries into Maternal Deaths and Morbidity 2013-2015. Oxford: National Perinatal Epidemiology  
37 Unit, University of Oxford 2017.  
38  
39  
40  
41  
42  
43 4. World Health Organization. Evaluating the quality of care for severe pregnancy  
44 complications: the WHO near-miss approach for maternal health. 2011.  
45  
46  
47 5. Tunçalp Ö, Hindin MJ, Souza J, Chou D, Say L. The prevalence of maternal near miss: a  
48 systematic review. *BJOG: An International Journal of Obstetrics & Gynaecology*. 2012;119(6):653-61.  
49  
50  
51 6. Royal College of Obstetricians and Gynaecologists. Patterns of maternity care in English NHS  
52 hospitals 2011/12: RCOG Press; 2013.  
53  
54  
55  
56  
57  
58  
59  
60

- 1  
2  
3 7. Nair M, Kurinczuk JJ, Knight M. Establishing a National Maternal Morbidity Outcome  
4  
5 Indicator in England: A Population-Based Study Using Routine Hospital Data. PLoS one.  
6  
7 2016;11(4):e0153370.
- 8  
9 8. Easter A, Howard L, Sandall J. Mental health near miss indicators in maternity care: a missed  
10  
11 opportunity? A Commentary. BJOG: An International Journal of Obstetrics & Gynaecology. 2017.
- 12  
13 9. Braun V, Clarke V. Using thematic analysis in psychology. Qualitative research in psychology.  
14  
15 2006;3(2):77-101.
- 16  
17 10. Fanjiang G, Grossman JH, Compton WD, Reid PP. Building a better delivery system: a new  
18  
19 engineering/health care partnership: National Academies Press; 2005.
- 20  
21 11. Thaddeus S, Maine D. Too far to walk: maternal mortality in context. Social science &  
22  
23 medicine. 1994;38(8):1091-110.
- 24  
25 12. Gabrysch S, Campbell OM. Still too far to walk: literature review of the determinants of  
26  
27 delivery service use. BMC pregnancy and childbirth. 2009;9(1):34.
- 28  
29 13. O'Hara MW, Wisner KL. Perinatal mental illness: definition, description and aetiology. Best  
30  
31 Practice & Research Clinical Obstetrics & Gynaecology. 2014;28(1):3-12.
- 32  
33 14. Howard LM, Megnin-Viggars O, Symington I, Group GD. Antenatal and postnatal mental  
34  
35 health: summary of updated NICE guidance. BMJ. 2014;349:g7394.
- 36  
37 15. Oates M. Perinatal psychiatric disorders: a leading cause of maternal morbidity and  
38  
39 mortality. British medical bulletin. 2003;67(1):219-29.
- 40  
41 16. Knight M, Kenyon S, Brocklehurst P, Neilson J, Shakespeare J, Kurinczuk J. Saving Lives,  
42  
43 Improving Mothers' Care Lessons learned to inform future maternity care from the UK and Ireland  
44  
45 Confidential Enquiries into Maternal Deaths and Morbidity 2009-2012. 2014.
- 46  
47 17. Bauer A, Parsonage M, Knapp M, Lemmi V, Adelaja B. Costs of perinatal mental health  
48  
49 problems. 2014.
- 50  
51 18. NHS England. 2017 [Available from: <https://www.england.nhs.uk/mental-health/perinatal/>.  
52  
53  
54  
55  
56  
57  
58  
59  
60

## Life-threatening situations in women with perinatal mental illness

- 1  
2  
3 19. Button S, Thornton A, Lee S, Shakespeare J, Ayers S. Seeking help for perinatal psychological  
4 distress: a meta-synthesis of women's experiences. Br J Gen Pract. 2017:bjgp17X692549.  
5  
6  
7 20. Megnin-Viggars O, Symington I, Howard LM, Pilling S. Experience of care for mental health  
8 problems in the antenatal or postnatal period for women in the UK: a systematic review and meta-  
9 synthesis of qualitative research. Archives of women's mental health. 2015;18(6):745-59.  
10  
11  
12  
13 21. Dennis CL, Chung-Lee L. Postpartum depression help-seeking barriers and maternal  
14 treatment preferences: A qualitative systematic review. Birth. 2006;33(4):323-31.  
15  
16  
17 22. Carter G, Milner A, McGill K, Pirkis J, Kapur N, Spittal MJ. Predicting suicidal behaviours using  
18 clinical instruments: systematic review and meta-analysis of positive predictive values for risk scales.  
19 The British Journal of Psychiatry. 2017:bjp. bp. 116.182717.  
20  
21  
22  
23 23. National Institute for Health and Care Excellence. NICE Guidelines Self-Harm: Longer Term  
24 Management (CG 133). NICE; 2011.  
25  
26  
27  
28  
29  
30  
31  
32  
33  
34  
35  
36  
37  
38  
39  
40  
41  
42  
43  
44  
45  
46  
47  
48  
49  
50  
51  
52  
53  
54  
55  
56  
57  
58  
59  
60

1  
2  
3  
4  
5  
6  
7  
8  
9  
10  
11  
12  
13  
14  
15  
16  
17  
18  
19  
20  
21  
22  
23  
24  
25  
26  
27  
28  
29  
30  
31  
32  
33  
34  
35  
36  
37  
38  
39  
40  
41  
42  
43  
44  
45  
46  
47  
48  
49  
50  
51  
52  
53  
54  
55  
56  
57  
58  
59  
60

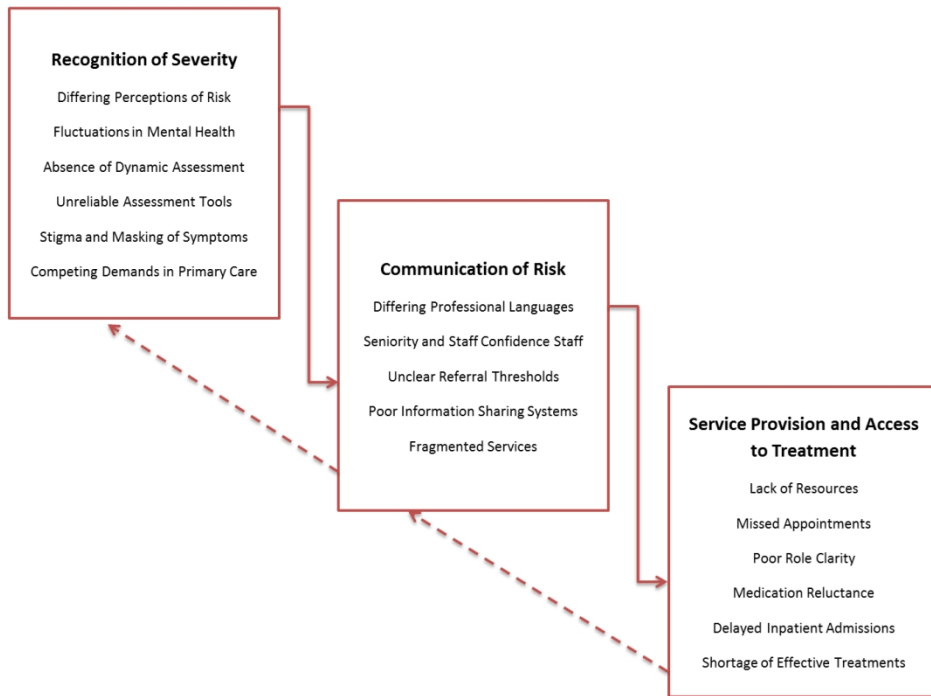

Figure 1: Overview of themes and sub-themes

## Standards for Reporting Qualitative Research (SRQR)\*

<http://www.equator-network.org/reporting-guidelines/srqr/>

Page/line no(s).

### Title and abstract

|                                                                                                                                                                                                                                                              |                   |
|--------------------------------------------------------------------------------------------------------------------------------------------------------------------------------------------------------------------------------------------------------------|-------------------|
| <p><b>Title</b> - Concise description of the nature and topic of the study Identifying the study as qualitative or indicating the approach (e.g., ethnography, grounded theory) or data collection methods (e.g., interview, focus group) is recommended</p> | Page 1/Line 3     |
| <p><b>Abstract</b> - Summary of key elements of the study using the abstract format of the intended publication; typically includes background, purpose, methods, results, and conclusions</p>                                                               | Page 2/Lines 6-56 |

### Introduction

|                                                                                                                                                                     |                    |
|---------------------------------------------------------------------------------------------------------------------------------------------------------------------|--------------------|
| <p><b>Problem formulation</b> - Description and significance of the problem/phenomenon studied; review of relevant theory and empirical work; problem statement</p> | Page 4/Lines 6-41  |
| <p><b>Purpose or research question</b> – Purpose of the study and specific objectives or questions</p>                                                              | Page 4/Lines 39-41 |

### Methods

|                                                                                                                                                                                                                                                                                                                                                                                                             |                                                               |
|-------------------------------------------------------------------------------------------------------------------------------------------------------------------------------------------------------------------------------------------------------------------------------------------------------------------------------------------------------------------------------------------------------------|---------------------------------------------------------------|
| <p><b>Qualitative approach and research paradigm</b> - Qualitative approach (e.g., ethnography, grounded theory, case study, phenomenology, narrative research) and guiding theory if appropriate; identifying the research paradigm (e.g., postpositivist, constructivist/ interpretivist) is also recommended; rationale**</p>                                                                            | Page 4/Lines 50-54<br>Page 5/Lines 40-51<br>Page 6 lines 6-27 |
| <p><b>Researcher characteristics and reflexivity</b> - Researchers' characteristics that may influence the research, including personal attributes, qualifications/experience, relationship with participants, assumptions, and/or presuppositions; potential or actual interaction between researchers' characteristics and the research questions, approach, methods, results, and/or transferability</p> | Page 6/Lines 30-38                                            |
| <p><b>Context</b> - Setting/site and salient contextual factors; rationale**</p>                                                                                                                                                                                                                                                                                                                            | Page 5/Lines 6-17                                             |
| <p><b>Sampling strategy</b> - How and why research participants, documents, or events were selected; criteria for deciding when no further sampling was necessary (e.g., sampling saturation); rationale**</p>                                                                                                                                                                                              | Page 5 /Lines 3-18                                            |
| <p><b>Ethical issues pertaining to human subjects</b> - Documentation of approval by an appropriate ethics review board and participant consent, or explanation for lack thereof; other confidentiality and data security issues</p>                                                                                                                                                                        | Page 5/Lines 20-30                                            |
| <p><b>Data collection methods</b> - Types of data collected; details of data collection procedures including (as appropriate) start and stop dates of data collection and analysis, iterative process, triangulation of sources/methods, and modification of procedures in response to evolving study findings; rationale**</p>                                                                             | Page 5/Lines 40-51                                            |



|    |  |  |
|----|--|--|
| 1  |  |  |
| 2  |  |  |
| 3  |  |  |
| 4  |  |  |
| 5  |  |  |
| 6  |  |  |
| 7  |  |  |
| 8  |  |  |
| 9  |  |  |
| 10 |  |  |
| 11 |  |  |
| 12 |  |  |
| 13 |  |  |
| 14 |  |  |
| 15 |  |  |
| 16 |  |  |
| 17 |  |  |
| 18 |  |  |
| 19 |  |  |
| 20 |  |  |
| 21 |  |  |
| 22 |  |  |
| 23 |  |  |
| 24 |  |  |
| 25 |  |  |
| 26 |  |  |
| 27 |  |  |
| 28 |  |  |
| 29 |  |  |
| 30 |  |  |
| 31 |  |  |
| 32 |  |  |
| 33 |  |  |
| 34 |  |  |
| 35 |  |  |
| 36 |  |  |
| 37 |  |  |
| 38 |  |  |
| 39 |  |  |
| 40 |  |  |
| 41 |  |  |
| 42 |  |  |
| 43 |  |  |
| 44 |  |  |
| 45 |  |  |
| 46 |  |  |
| 47 |  |  |
| 48 |  |  |
| 49 |  |  |
| 50 |  |  |
| 51 |  |  |
| 52 |  |  |
| 53 |  |  |
| 54 |  |  |
| 55 |  |  |
| 56 |  |  |
| 57 |  |  |
| 58 |  |  |
| 59 |  |  |
| 60 |  |  |

|                                                                                                                                                                                                                                                       |                                         |
|-------------------------------------------------------------------------------------------------------------------------------------------------------------------------------------------------------------------------------------------------------|-----------------------------------------|
| <b>Data collection instruments and technologies</b> - Description of instruments (e.g., interview guides, questionnaires) and devices (e.g., audio recorders) used for data collection; if/how the instrument(s) changed over the course of the study | Page 5/ Lines 40-51                     |
| <b>Units of study</b> - Number and relevant characteristics of participants, documents, or events included in the study; level of participation (could be reported in results)                                                                        | Page 7/Lines 9-50 (Table 1)             |
| <b>Data processing</b> - Methods for processing data prior to and during analysis, including transcription, data entry, data management and security, verification of data integrity, data coding, and anonymization/de-identification of excerpts    | Page 6/Lines 6-38                       |
| <b>Data analysis</b> - Process by which inferences, themes, etc., were identified and developed, including the researchers involved in data analysis; usually references a specific paradigm or approach; rationale**                                 | Page 6/Lines 6-38                       |
| <b>Techniques to enhance trustworthiness</b> - Techniques to enhance trustworthiness and credibility of data analysis (e.g., member checking, audit trail, triangulation); rationale**                                                                | Page 5/Lines 6-16<br>Page 6/Lines 30-38 |

### Results/findings

|                                                                                                                                                                                                   |                         |
|---------------------------------------------------------------------------------------------------------------------------------------------------------------------------------------------------|-------------------------|
| <b>Synthesis and interpretation</b> - Main findings (e.g., interpretations, inferences, and themes); might include development of a theory or model, or integration with prior research or theory | Pages 15-22<br>Figure 1 |
| <b>Links to empirical data</b> - Evidence (e.g., quotes, field notes, text excerpts, photographs) to substantiate analytic findings                                                               | Pages 8-13              |

### Discussion

|                                                                                                                                                                                                                                                                                                                                                                                                             |                                          |
|-------------------------------------------------------------------------------------------------------------------------------------------------------------------------------------------------------------------------------------------------------------------------------------------------------------------------------------------------------------------------------------------------------------|------------------------------------------|
| <b>Integration with prior work, implications, transferability, and contribution(s) to the field</b> - Short summary of main findings; explanation of how findings and conclusions connect to, support, elaborate on, or challenge conclusions of earlier scholarship; discussion of scope of application/generalizability; identification of unique contribution(s) to scholarship in a discipline or field | Page 14 Lines 42-55<br>Page 15 line 3-42 |
| <b>Limitations</b> - Trustworthiness and limitations of findings                                                                                                                                                                                                                                                                                                                                            | Page 15/Line 45-56<br>Page 16/Lines 3-38 |

### Other

|                                                                                                                                               |                     |
|-----------------------------------------------------------------------------------------------------------------------------------------------|---------------------|
| <b>Conflicts of interest</b> - Potential sources of influence or perceived influence on study conduct and conclusions; how these were managed | Page 17/Lines 42    |
| <b>Funding</b> - Sources of funding and other support; role of funders in data collection, interpretation, and reporting                      | Page 17/Lines 11-32 |

\*The authors created the SRQR by searching the literature to identify guidelines, reporting standards, and critical appraisal criteria for qualitative research; reviewing the reference lists of retrieved sources; and contacting experts to gain feedback. The SRQR aims to improve the transparency of all aspects of qualitative research by providing clear standards for reporting qualitative research.

1  
2  
3 \*\*The rationale should briefly discuss the justification for choosing that theory, approach,  
4 method, or technique rather than other options available, the assumptions and limitations  
5 implicit in those choices, and how those choices influence study conclusions and  
6 transferability. As appropriate, the rationale for several items might be discussed together.  
7

8 **Reference:**

9 O'Brien BC, Harris IB, Beckman TJ, Reed DA, Cook DA. **Standards for reporting qualitative**  
10 **research: a synthesis of recommendations.** *Academic Medicine*, Vol. 89, No. 9 / Sept 2014  
11 DOI: 10.1097/ACM.0000000000000388  
12  
13  
14  
15  
16  
17  
18  
19  
20  
21  
22  
23  
24  
25  
26  
27  
28  
29  
30  
31  
32  
33  
34  
35  
36  
37  
38  
39  
40  
41  
42  
43  
44  
45  
46  
47  
48  
49  
50  
51  
52  
53  
54  
55  
56  
57  
58  
59  
60

For peer review only

# BMJ Open

## Recognition and response to life-threatening situations among women with perinatal mental illness: A qualitative study

|                                 |                                                                                                                                                                                                                                                                                                                      |
|---------------------------------|----------------------------------------------------------------------------------------------------------------------------------------------------------------------------------------------------------------------------------------------------------------------------------------------------------------------|
| Journal:                        | <i>BMJ Open</i>                                                                                                                                                                                                                                                                                                      |
| Manuscript ID                   | bmjopen-2018-025872.R1                                                                                                                                                                                                                                                                                               |
| Article Type:                   | Research                                                                                                                                                                                                                                                                                                             |
| Date Submitted by the Author:   | 13-Dec-2018                                                                                                                                                                                                                                                                                                          |
| Complete List of Authors:       | Easter, Abigail; King's College London, Institute of Psychiatry, Psychology and Neuroscience, Health Service and Population Research Department<br>Howard, Louise; institute of psychiatry, health service and population research<br>Sandall, Jane; Kings College, London, Health and Social Care Research Division |
| <b>Primary Subject Heading</b>: | Mental health                                                                                                                                                                                                                                                                                                        |
| Secondary Subject Heading:      | Mental health, Obstetrics and gynaecology, Qualitative research, Emergency medicine                                                                                                                                                                                                                                  |
| Keywords:                       | QUALITATIVE RESEARCH, Perinatal Mental Health, MENTAL HEALTH, Maternal Mortality, Near Miss                                                                                                                                                                                                                          |
|                                 |                                                                                                                                                                                                                                                                                                                      |

SCHOLARONE™  
Manuscripts

1  
2  
3 **Recognition and response to life-threatening situations among women with perinatal mental**  
4  
5 **illness: A qualitative study**  
6  
7

8 A. Easter,<sup>1</sup> L.M Howard,<sup>2</sup> J. Sandall<sup>3</sup>  
9  
10

- 11  
12  
13  
14  
15 1. Centre for Implementation Science, Health Service Research and Population Department,  
16 Institute of Psychiatry, Psychology and Neuroscience, King's College London, London, UK  
17  
18 2. Section of Women's Mental Health, Health Service Research and Population Department,  
19 Institute of Psychiatry, Psychology and Neuroscience, King's College London, London, UK  
20  
21 3. Department of Women and Children's Health, King's College London, St Thomas' Hospital,  
22 London, UK  
23  
24  
25  
26  
27  
28  
29  
30  
31

32 **Correspondence to Dr Abigail Easter**  
33

34  
35 Address Centre for Implementation Science, Health Service Research and Population Department,  
36 Institute of Psychiatry, Psychology and Neuroscience, King's College London, PO25, David  
37 Goldberg Centre, De Crespigny Park, London, SE5 8AF  
38  
39

40  
41  
42 Email: abigail.easter@kcl.ac.uk  
43  
44

45  
46 Telephone: 020 7 848 5548  
47  
48  
49  
50  
51  
52  
53  
54  
55  
56  
57  
58  
59  
60

## Life-threatening situations in women with perinatal mental illness

**Abstract**

**Objective:** Mental illness has persistently been found to be a leading cause of death during pregnancy and the year after birth (the perinatal period). This study aims to explore barriers to detection, response and escalation of mental health related life-threatening near miss events among women with perinatal mental illness.

**Design:** Qualitative study

**Participants:** Healthcare professionals (HCP) working in psychiatry, maternity and primary care (n=15) across community and hospital maternity and perinatal services within the UK.

**Methods:** In-depth semi-structured interviews were conducted with a range of healthcare professionals working with women during the perinatal period. Inductive thematic analysis was employed to analyse the data.

**Results:** Three overarching themes were identified: recognition of severity, communication of risk, and service provision and access to treatment. Differing perspectives of mental illness severity influenced how life-threatening situations among women with perinatal mental illness were described, recognised and communicated between teams. Under-resourced mental health service provision, particularly within emergency and specialist perinatal mental health services, unclear thresholds for escalating care and poor infrastructure for sharing information all contributed to delays in a timely response to crisis situations. Reluctance to prescribe medication or admit women to psychiatric hospital, stigma, and missed appointments created further delays.

**Conclusions:** Several complex and inter-related healthcare barriers to detection, response and escalation of care for potentially life-threatening situations among women with perinatal mental illness exist. Focusing on how differences in organisational and professional culture contribute to the recognition of severe mental illness and inter-disciplinary communication may help facilitate clearer co-ordination between teams.

**Strengths and Limitations of the study**

- This is the first study to explore maternal near misses among women with a range of perinatal mental illnesses, which identifies several important barriers to detection & response of life-threatening situations among women with perinatal mental illness.
- As a small explorative qualitative study of healthcare professionals in the UK the study findings may not be generalizable to other settings.
- Women's perspectives are not explored within this study.

**Key words:** Qualitative, Perinatal Mental Health, Maternal Mortality, Near Miss

## Life-threatening situations in women with perinatal mental illness

**Introduction**

Mental illness is common during pregnancy and the first year postpartum (the perinatal period), with major depression or anxiety affecting approximately 10% of women.<sup>(1)</sup> Recent confidential enquiries into maternal deaths in the UK suggest that approximately a quarter (24%) of women who died between 2014-16 had a mental illness and 1 in 5 women died from suicide in the year following birth.<sup>(2)</sup> As such, maternal suicide is the third largest cause of direct maternal deaths occurring during or within 42 days of the end of pregnancy. However, it remains the leading cause of direct deaths occurring within a year after the end of pregnancy, with a mortality rate of 2.8 per 100,000 maternities.

A near miss approach can be a valuable method for studying the processes in place for recognising and responding to clinical deterioration, and has been widely adopted to study severe maternal morbidity.<sup>(3, 4)</sup> A maternal near miss is typically defined as 'severe life-threatening complications not resulting in death'.<sup>(4)</sup> Several tools for identifying maternal near misses exist,<sup>(3, 5, 6)</sup> yet despite the high mortality in perinatal period relating to mental rather than physical health they focus almost entirely on clinical indicators of physical health with limited consideration of mental health.<sup>(7)</sup>

This represents a significant research gap, since current approaches to investigating maternal morbidity and mortality rely upon identifying preceding clinical characteristics associated with a worsening of condition. Developing strategies to identify women at risk of life-threatening mental illness is therefore of clear clinical importance in order to ensure that timely and appropriate intervention are available to those at greatest risk.

The purpose of this study is to explore potential barriers to detection, response and escalation of mental health related life-threatening events among women with perinatal mental illness.

## Methods

### *Design*

Given the absence of prior research into psychiatric maternal near miss events, an exploratory qualitative study, utilising in-depth semi-structured interviews with healthcare professionals (HCP), was adopted. Patient safety incidence, such as near miss events, are often under-reported therefore qualitative methodology may also be useful to explore in-depth the potential complexity of the barriers surrounding detection and response to maternal near miss events.

### *Participants and Setting*

This UK based study aimed to recruit a sample of HCP working with women with mental illness during the perinatal period (i.e. during pregnancy and up to the first-year post birth).

Purposeful and convenience sampling were used to recruit a national sample of HCP from five different healthcare disciplines ( i.e. Psychiatry, Psychology, Midwifery, Obstetrics, and Health Visiting), across a range of healthcare settings (i.e. inpatient, outpatient and community teams). Rigour and transferability were optimised by sampling respondents with differing characteristics.

Two main recruitment methods were utilised. First, convenience sampling was used to identify potential participants via direct emails to professional mailing lists and promotion of the study to professional groups via social media (i.e. Twitter and Facebook). Second, purposeful sampling (based on healthcare discipline and setting, and geographical location in the UK) was adopted to identify and directly email potential participants that were not represented in the first round of sampling.

Interested participants received an information sheet and were offered the opportunity to discuss the study; those agreeing to participate provided written informed consent prior to the interview.

Recruitment to the study was concurrent with data analysis, and data collection proceeded until no further unique themes were identified in successive interviews (saturation). Although there is no



## Life-threatening situations in women with perinatal mental illness

1  
2  
3 agreed method for establishing data saturation, after 15 interviews a range of HCP experiences had  
4  
5 been captured, and it was felt that no new themes were emerging and data saturation was reached.  
6  
7

*Data Collection*

8  
9  
10  
11 Interviews were semi-structured and followed a topic guide. Questions were open-ended and  
12  
13 iteratively revised following initial interviews to allow further exploration of the issues that arose.  
14  
15 Due to differing definitions of near misses across different disciplines, following a brief exploration of  
16  
17 what HCP thought of as a psychiatric near miss event, they were directed to focus on situations that  
18  
19 they thought were life-threatening to the service user involved. All interviews were undertaken by  
20  
21 one researcher (AE), by phone or face to face. Interviews were audio recorded and transcribed  
22  
23 verbatim.  
24  
25  
26  
27  
28  
29  
30

*Data Analysis*

31  
32  
33  
34 Data were managed using qualitative software, NVIVO V.11. A iterative process of inductive and  
35  
36 deductive thematic analysis, as described by Braun and Clarke, was used to identify common themes  
37  
38 in the data.<sup>(8)</sup> AE read the transcripts several times to become immersed in the data. Text relating to  
39  
40 barriers to detection, response and escalation of potential life-threatening psychiatric events among  
41  
42 women with perinatal mental illness was extracted. Initial line-by-line inductive coding was  
43  
44 conducted, before grouping meaningful sub-themes into overarching themes. Grouping of themes  
45  
46 and sub-themes was informed by two key theories, outlined below, to facilitate a more in-depth  
47  
48 understanding of barriers to detection and response from a healthcare systems perspective, rather  
49  
50 than solely focusing on individual level barriers. The emerging themes were used to modify the  
51  
52 interview schedule and inform subsequent interviews and analysis.  
53  
54  
55  
56

*Theoretical Underpinnings*

## Life-threatening situations in women with perinatal mental illness

1  
2  
3 Data analysis and interpretation was informed by Systems Theories of healthcare,<sup>(9)</sup> and the 'Three  
4 Delays Model'.<sup>(10, 11)</sup>  
5  
6

7  
8 General systems theory, views healthcare practices within the context of a complex and interacting  
9 system. It asserts that individuals (e.g. patients, families, healthcare professionals) do not act in  
10 isolation; and therefore can only be understood by exploring the healthcare system as a whole and  
11 how different levels of the system interact. Factors that contribute to the healthcare system have  
12 been conceptualised as the interplay between three fundamental levels: micro (e.g. individual  
13 patients and healthcare professionals and their interactions), meso (e.g. the organisational context)  
14 and macro (e.g. wider healthcare systems and political context).  
15  
16  
17  
18  
19  
20  
21  
22  
23  
24

25 The three delays model was originally proposed to help facilitate understanding of the factors that  
26 prevent or delay women from accessing safe maternity care. Delays are proposed to occur at three  
27 key points: 1) delay in seeking care; 2) delay in reaching care, and 3) delay in receiving care once at  
28 an appropriate healthcare facility. The model has been used in a variety of international settings to  
29 help understand healthcare factors relating to maternal and perinatal mortality, and implement  
30 targeted changes in healthcare systems.  
31  
32  
33  
34  
35  
36  
37  
38

39 These theories were used to help structure the topic guide and help facilitate exploration of  
40 potential barriers at different levels of the healthcare system (e.g. micro, meso and macro) and  
41 within a woman's care pathway. To draw out the complexity relating to the number of healthcare  
42 professionals and disciplines involved in women's perinatal mental healthcare the analysis focused  
43 on desalinating differing perceptions between HCP.  
44  
45  
46  
47  
48  
49  
50

51 All authors discussed the initial coding framework and emerging themes to ensure that alternative  
52 viewpoints had been considered, reviewed the thematic labels applied and agree on the final  
53 overarching and sub-themes. This process helped to highlight alternative interpretations, which  
54  
55  
56  
57  
58  
59  
60

## Life-threatening situations in women with perinatal mental illness

1  
2  
3 were reflective of the different academic and clinical background (maternity, psychiatry and  
4  
5 psychology) of the research team.  
6  
7

**Patient and Public Involvement**

8  
9  
10  
11 Feedback on the preliminary findings from the thematic analysis was sought from a patient and  
12  
13 public involvement (PPI) group consisting of women, and family members, with lived experience of  
14  
15 perinatal mental illness. Discussions held with the PPI group helped to refine the labels assigned to  
16  
17 codes and themes, and their descriptions as presented in this manuscript. In addition, they have  
18  
19 helped to identify areas for future research studies to further understanding of the support needs of  
20  
21 women and families.  
22  
23  
24  
25  
26  
27  
28  
29  
30  
31  
32  
33  
34  
35  
36  
37  
38  
39  
40  
41  
42  
43  
44  
45  
46  
47  
48  
49  
50  
51  
52  
53  
54  
55  
56  
57  
58  
59  
60

## Results

### *Participants*

A total of 15 HCP participated in the current study: 5 psychiatrists, 5 midwives, 2 health visitors, 1 General Practitioner, 1 psychologist and 1 obstetrician. Participants were recruited from the following regions: East of England (n=3), London (n=4), North East England (n=2) South East England (n=1), South West England (n=1), the West Midlands (n=2), Yorkshire and Humber (n=1), Wales (n=1). Five participants were recruited via social media, four responded to mailing lists and six were purposefully recruited via direct email. Participant characteristics are shown in Table 1.

**Table 1: Characteristics of Interview Participants**

| Participant Number | Gender | Profession           | Setting                                  |
|--------------------|--------|----------------------|------------------------------------------|
| 01                 | F      | Psychiatrist         | Community Perinatal Psychiatry           |
| 02                 | M      | Psychiatrist         | Adult Psychiatry                         |
| 03                 | M      | Psychiatrist         | Inpatient Mother and Baby Hospital       |
| 04                 | F      | Midwife              | Community Midwifery                      |
| 05                 | F      | Psychiatrist         | Inpatient/Community Perinatal Psychiatry |
| 06                 | F      | General Practitioner | General Practice                         |
| 07                 | F      | Midwife              | Community Midwifery/Maternity Hospital   |
| 08                 | F      | Health Visitor       | Community Health Visiting/Management     |
| 09                 | F      | Psychologist         | Outpatients Clinic                       |
| 10                 | F      | Midwife              | Community Midwifery/Management           |
| 11                 | F      | Psychiatrist         | Community Perinatal Psychiatry           |
| 12                 | F      | Obstetrician         | Maternity Hospital                       |
| 13                 | F      | Health Visiting      | Community Health Visiting                |

## Life-threatening situations in women with perinatal mental illness

|    |   |         |                                        |
|----|---|---------|----------------------------------------|
| 14 | F | Midwife | Community Midwifery/Maternity Hospital |
| 15 | F | Midwife | Community Midwifery                    |

*Inconsistent Definitions and Criteria*

There was considerable inconsistency in how HCP conceptualised a maternal near miss or life-threatening event relating to mental health, which was driven by different definitions in use across the specialisms. The most typical examples were attempted suicides, although self-harm, harm to others and severe mental health relapses were also discussed.

As depicted in Figure 1, barriers to identifying and responding to a potentially life-threatening event in mental health occurred at three levels of the healthcare system: recognition of severity, communication of risk and service provision and access to treatment.

**Figure 1 here****1. Recognition of Severity***Differing Perceptions of Risk*

A primary requisite to providing appropriate and timely mental health treatment is the ability to accurately determine the severity of a woman's symptoms and level of risk. However, differing perception of risk and illness severity across healthcare disciplines acted as a key barrier to identifying the level of mental health assessment or treatment a woman needed. This impacted on detection and response to potentially life-threatening situations in two ways. Perinatal Psychiatrists described situations where they felt that primary HCP (i.e. midwives, health visitors and general practitioners) and non-perinatal psychiatry teams had underestimated the level of risk of a situation, which contributed to delays in accessing specialist care.

## Life-threatening situations in women with perinatal mental illness

1  
2  
3 *“...she was someone who in the first two weeks postnatally she'd been referred to the CMHT*  
4 *[Community Mental Health Team] ... but, because she wasn't referred urgently (the GP was just a bit*  
5 *concerned) and she was sent an appointment, but by that time she'd already jumped [off a high*  
6 *building ...but survived].” (Perinatal Psychiatrist)*  
7  
8  
9  
10  
11  
12

13 By comparison, primary HCP frequently expressed difficulties escalating care for women that they  
14 perceived to be at risk of a life-threatening event when their concerns were not shared by mental  
15 health teams. This was most often described within the context of self-harm and created uncertainty  
16 about whether self-harm represented a risk of a more life-threatening injury and frustration about a  
17 lack of prioritisation of such cases.  
18  
19  
20  
21  
22  
23  
24

25 *“Maybe in their world of mental health it's not so bad. Obviously for me, from my perspective we've*  
26 *got a woman who is doing that [harming] to herself and God knows what else she could do”*  
27  
28

29  
30 *(Midwife)*  
31

### 32 *Fluctuations in Mental Illness*

33  
34

35 Unlike many physical illnesses, which typically have a more linear deterioration prior to a maternal  
36 near miss, symptoms of mental illness and levels of risk can fluctuate over time, sometimes very  
37 rapidly.(12) Fluctuation in symptom severity was identified as a fundamental challenge when trying  
38 to identify women at risk of a life-threatening event before it occurred.  
39  
40  
41  
42  
43  
44

45 *“...so in actual fact we assessed her as being relatively low risk but ... she had just had a visit from*  
46 *her family which had been quite a distressing visit which had obviously changed the risk... In*  
47 *retrospect we didn't respond appropriately to that.” (Perinatal Psychiatrist)*  
48  
49  
50  
51  
52

53 Midwives and Health Visitors highlighted that this lack of regular enquiry about a woman's mental  
54 health status throughout the perinatal period also created barriers to recognising signs of  
55 deterioration. Competing role demands sometimes meant that a woman's mental health or  
56 wellbeing may not be asked about at each visit unless there was cause for concern. This was  
57  
58  
59  
60

## Life-threatening situations in women with perinatal mental illness

1  
2  
3 compounded by a lack of continuity of care, resulting in midwives being less able to detect changes  
4  
5 in a woman's mental health.  
6  
7

8 *"...it's based on booking, so unless the woman actually comes back and says, "Do you know what?*  
9  
10 *I'm not feeling very well, I'm not doing very well," it won't be necessarily revisited again during*  
11  
12 *pregnancy and also postnatally. "(Midwife)*

### 13 14 15 16 *Risk Assessment Tools*

17  
18 Although HCP described tools available to assess women's risk or symptom severity, it was apparent  
19  
20 that these tools were not reliable or regularly implemented. In some cases this led to disagreements  
21  
22 among clinicians about the level of risk woman was presenting with, and contributed to difficulties in  
23  
24 communicating risk between teams.  
25  
26

27  
28 *"...we really just use a standard clinical interview really to find out what they are telling us and what*  
29  
30 *we work out from psychiatric examination to tell us how risky they actually are. There isn't really a*  
31  
32 *standardized tool which works, I don't think." (Psychiatrist)*  
33  
34  
35

## 36 37 **2. Communication of Risk**

38  
39 During the perinatal period a range of HCP are involved in women's care, communication within and  
40  
41 between teams is therefore paramount to recognising and responding to high risk situations,  
42  
43 however several communication barriers were identified.  
44  
45

### 46 47 *Differing Professional Languages*

48  
49 Health Visitors and Midwives spoke about difficulties communicating symptoms and deterioration of  
50  
51 mental illness to mental health teams, commenting that it felt as if they 'spoke different languages'.  
52  
53 Primary care staff felt that their training and professional background did not adequately equip them  
54  
55 to convey concerns about a mothers' mental health or accurately describe particular symptoms. In  
56  
57  
58  
59  
60

## Life-threatening situations in women with perinatal mental illness

1  
2  
3 some cases this resulted in several re-referrals to mental health services, potentially creating delays  
4  
5 to receiving care.  
6  
7

8  
9 *"...what I used to find is that health visitors would have an issue, a concern, and ring the mental*  
10 *health services, but because they weren't really clear about what they were saying or what they were*  
11 *doing so they would say, "'Well, it wasn't accepted.'" I'd say, 'Right, ring back and say this [...] and*  
12 *give them the language. And then once you did that, the referral was accepted. It's something about*  
13 *the language and the culture that each profession uses as well that makes it more likely that a*  
14 *woman will be seen appropriately."* (Health Visitor)  
15  
16  
17  
18  
19  
20  
21  
22

23 This appeared to be compounded by a lack of confidence among junior primary care staff about  
24 communicating with specialist mental health teams in relation to illnesses outside of their discipline,  
25 whereas support from senior staff helped facilitate these conversations.  
26  
27  
28  
29

### 30 *Unclear Referral Thresholds*

31  
32  
33 During the perinatal period clinical guidance in the UK recommends a lower threshold for referral  
34 and intervention for mental illness.<sup>(13)</sup> However, healthcare professionals often described a sense of  
35 confusion and frustration about what symptoms would constitute a referral being accepted by  
36 secondary mental health teams. This was strongly related to themes of differing perceptions of  
37 severity between specialisms and difficulties communicating levels of risk in referral forms. Midwives  
38 and Health Visitors often felt that thresholds for secondary mental health services were too high,  
39 which led to referrals not being accepted and left primary healthcare professionals unsure of how to  
40 manage the mental healthcare of such women.  
41  
42  
43  
44  
45  
46  
47  
48  
49  
50

51  
52 *"...we are working very much and saying if they have got these pre-existing conditions that the*  
53 *referral needs to go in and it needs to bypass the lower level of support. It needs to go straight*  
54 *through to the secondary levels so that the Perinatal Team will pick it up. But it's just very difficult to*  
55 *write the referral so that you can get it through to meet those thresholds."* (Midwife)  
56  
57  
58  
59  
60



## Life-threatening situations in women with perinatal mental illness

1  
2  
3 By comparison, Psychiatrists sometimes expressed frustration in the number of 'inappropriate'  
4 referrals to mental health services, which they had limited capacity to manage.  
5  
6  
7

8 *"On the referral form, we've got risk assessments, suicide risk or self-harm, we particularly*  
9 *highlighted them you could see that. The problem is ... we've had women who've taken an overdose*  
10 *10 years ago and then the nurses, the midwives read that and they put the highest score for suicide*  
11 *risk and actually it's very historical."* (Psychiatrist)  
12  
13  
14  
15  
16  
17

### 18 *Poor Information Sharing and Fragmented Services*

19

20  
21 The ability to communicate risks and concerns between different health and social care  
22 professionals involved in women's care was also impacted by a lack of integrated clinical records.  
23  
24 HCP often spoke about managing the care of a woman but not being fully aware of involvement  
25 from other services, sometimes having to rely upon women to provide information about their care.  
26  
27  
28  
29

30  
31 *"I find that because we all have different IT systems where we keep our records, nothing speaks to*  
32 *each other; we don't have access to each other's records [...] I think that there are issues with that*  
33 *about the fact we can't see what Mental Health have written, Mental Health can't see what we're*  
34 *writing, Social Care can't see what any of us are writing."* (Midwife)  
35  
36  
37  
38  
39  
40

### 41 **3. Service Provision and Access to Treatment**

42

#### 43 *Lack of Resources*

44  
45  
46

47 A key theme from all interviews that contributed to missed opportunities for care among women  
48 with potentially life-threatening illnesses was a lack of resources for mental health service provision,  
49 which affected the capacity for response to high risk situations. In addition, a lack of appropriate  
50 mental health emergency and crisis care services resulted in a deficiency of rapid response in the  
51 community. Several HCP viewed Accident and Emergency Departments (A&E) as inappropriate  
52  
53  
54  
55  
56  
57  
58  
59  
60

## Life-threatening situations in women with perinatal mental illness

1  
2  
3 facilities for a mental health crisis, particularly during pregnancy, and highlighted women's  
4  
5 reluctance to attend A&E for their mental health.  
6  
7

8 *"In terms of getting the crisis team to attend or getting the GP to attend out of hours has always*  
9 *been... well a bit fraught really and not knowing who to ring for the best and the crisis team saying,*  
10 *"Yes, can send someone but it's going to be six hours, which isn't exactly considered a crisis."* (Health  
11  
12  
13  
14  
15 Visitor)

### 16 17 18 Medication Reluctance

19  
20  
21 It was apparent from some interviews that a reluctance to prescribe psychotropic medication or to  
22  
23 recommend an inpatient admission during the perinatal period was also a factor that affected the  
24  
25 type of treatment women received for mental illness during pregnancy or during early motherhood.  
26  
27 Other interviews emphasised the role of the women and families in deciding to stop medication  
28  
29 during the perinatal period which was felt to contribute to deterioration in mental health.  
30  
31

32  
33 *"Sometimes there is sort of a resistance from psychiatry services to up medication and be*  
34 *more aggressive with it so that you can actually try and sort out the medical problem."*  
35  
36

37  
38 (Obstetrician)  
39  
40

### 41 Missed Appointments

42  
43  
44 HCP also spoke about how a perceived stigma and fear of social service involvement led to women  
45  
46 *"masking their symptoms"* from clinical staff or not attending clinical appointments, which created  
47  
48 additional difficulties in spotting early warning signs.  
49  
50

51 *"It's the woman who don't attend or don't disclose, I think they're most at risk groups [...]*  
52  
53 *The women that I do see in the clinic are the ones at least I'm worried about, it's those I'm*  
54  
55 *not seeing are the ones I'm most worried about."* (Psychiatrist)  
56  
57  
58  
59  
60

## Life-threatening situations in women with perinatal mental illness

*Poor Role Clarity*

Several HCP also highlighted that poor role clarity was also a factor that contributed to women deemed at risk of a life-threatening event not receiving an appropriate level of treatment. This was particularly the case in situations where a woman was currently well, but at high risk of relapse or severe mental illness in the postpartum period, which created confusion over whose role it was to monitor the well-being of a woman and escalate care if necessary.

*“She doesn’t get accepted (for mental health treatment) and then the response from perinatal is for the midwife to monitor and the GP to monitor. I came back and said, “There’s (so few) midwives in the team, and what exactly is this midwife, who is a midwife, monitoring? What exactly do want her to monitor? Secondly, what is this about the GP? Don’t we understand how GP’s work?” Monitor what? [...] “What do you mean monitor?” Midwives are there to monitor the pregnancy, but we are not mental health nurses, we are not psychiatrists.” (Midwife)*

Psychiatrists described discharging women to the primary care staff who did not meet the threshold for specialist mental health services, but required closer monitoring and support. However, primary care staff often expressed feeling unclear or ill-equipped in their role and how to monitor the mental healthcare of these women. Some midwives perceived the mental health of the women they were managing to be too severe or high risk and warranted greater support from mental health specialists; highlighting a lack of middle tier mental health services to monitor and support women who may be at risk of deterioration.

**Discussion**

Accurate identification and treatment of mental illnesses that may become life threatening during the perinatal period is an important quality and safety issue and crucial to reducing the maternal death rate.<sup>(14, 15)</sup> This study illustrates several inter-related barriers to detection, response and escalation of mental health care in potentially life-threatening situations that occur at all levels of

## Life-threatening situations in women with perinatal mental illness

1  
2  
3 the healthcare system. Differing perceptions of risk and severity of mental illness between the  
4  
5 various HCP involved in a woman's perinatal care had significant consequences for how situations  
6  
7 were interpreted and communicated between teams. In many cases, these barriers to  
8  
9 communication were further compounded by a perception of a lack of reliable tools to assess risk,  
10  
11 unclear thresholds for escalating care and poor infrastructure for sharing information.  
12  
13

14  
15 These findings are consistent with recent maternal deaths enquiries which have found poor  
16  
17 communication between maternity and mental health services to be a significant factor in many of  
18  
19 the mental health related deaths.<sup>(16)</sup> In particular, the 2017 MBRRACE report highlighted that a  
20  
21 narrow interpretation of risk (e.g. that focused on a woman's current symptom presentation)  
22  
23 resulted in an under recognition and treatment of women with mental illness.<sup>(17)</sup> Healthcare  
24  
25 communication is a complex process and this study emphasises the important influence of how signs  
26  
27 of mental illness are interpreted and communicated, which was strongly embedded within HCP  
28  
29 training and experiences, confidence and professional cultures. In order to improve communication  
30  
31 between primary and mental healthcare professionals there is a clear need to adopt strategies that  
32  
33 target such cultural factors and help facilitate communication between teams.  
34  
35  
36  
37

38  
39 Clinical guidelines in the UK recommend the use of two questions ('the Whooley questions') to aid  
40  
41 identification of depression and other mental illnesses during pregnancy and the early postnatal  
42  
43 period.<sup>(13)</sup> Several previous studies have highlighted barriers to implementing these assessments in  
44  
45 practice, such as time constraints and lack of training and knowledge about perinatal mental  
46  
47 health.<sup>(18)</sup> The present study suggests that the implementation of routine questions to identify  
48  
49 mental illness may be more complex within the current healthcare system. For example, lack of on-  
50  
51 going assessment of women's mental health throughout the perinatal period reduced the ability to  
52  
53 identify significant changes in symptom presentation. Furthermore, challenges in interpreting  
54  
55 responses to the questions arose from a lack of continuity of care and unclear thresholds and  
56  
57  
58  
59  
60

## Life-threatening situations in women with perinatal mental illness

1  
2  
3 pathways of referral, which created uncertainty among healthcare professionals about the  
4  
5 appropriate treatment response.  
6  
7

8 Under-resourced mental health service provision further contributed to women not being assessed  
9  
10 by a specialist within an adequate time-frame. A shortage of services for moderate mental illness  
11  
12 led to primary care staff monitoring and managing the care of women they perceived to require  
13  
14 greater support, creating confusion about referral thresholds. Lack of perinatal mental health  
15  
16 services in the UK is well-documented,<sup>(19)</sup> and recent government investments aim to increase access  
17  
18 by 30,000 women by 2021.<sup>(20)</sup> However, In addition to a lack of specialist services, HCP emphasised  
19  
20 several other barriers, which included both healthcare level factors (e.g. a reluctance to prescribe  
21  
22 medication or admit women to mental health hospitals during pregnancy or early post-birth) and  
23  
24 patient and family level factors (e.g. stigma and missed appointments).  
25  
26  
27

28  
29 This is the first study to explore maternal near misses or life-threatening situations among women  
30  
31 with perinatal mental illnesses. Interviews with a range of professionals involved in women's  
32  
33 antenatal and postnatal care allowed us to compare the views of different HCP and the impact that  
34  
35 this had on recognition and response. Although several previous studies have explored experiences  
36  
37 of care among women with perinatal mental illness,<sup>(21-23)</sup> none have distinguished between women  
38  
39 with high-risk mental illness, requiring rapid assessment and escalation and those with mild-  
40  
41 moderate mental illness. This is important since differing levels of risk and severity require different  
42  
43 communication strategies and treatment response. Failure to objectively differentiate between  
44  
45 levels of risk and severity in mental health literature is likely to further compound the challenges  
46  
47 highlighted in this study.  
48  
49  
50

51  
52 However, there are some study limitations that require consideration. This is a small qualitative  
53  
54 study of HCP in the UK, which may not be generalizable to other settings. Importantly, women's  
55  
56 perspectives are not explored within this study. Given the sensitive nature of the topic, future  
57  
58  
59  
60

## Life-threatening situations in women with perinatal mental illness

1  
2  
3 research should be co-designed with women, and families, with experience of mental illness to  
4  
5 adopt appropriate and sensitive research methods.  
6  
7

8 Furthermore, the utility and applicability of the concept of clinical deterioration and access to timely  
9  
10 care, as proposed by the 'three delay model' of maternal mortality, requires further consideration  
11  
12 within the context of psychiatric near miss events, since not all psychiatric maternal near misses will  
13  
14 occur within the context of clinical deterioration. As highlighted by several healthcare professionals,  
15  
16 an absence of reliable and dynamic methods of risk assessment impeded their ability to predict  
17  
18 those at most risk of a life-threatening event. This is supported by a recent meta-analysis of risk  
19  
20 scales, which demonstrated the predictive power of such scales on future suicidal behaviours was  
21  
22 too low to advocate their use.<sup>(24)</sup> Instead, a focus on individual needs based assessments and  
23  
24 modifiable risk factors is recommended.<sup>(24, 25)</sup>  
25  
26  
27  
28

29 In conclusion, barriers to response and escalation of mental healthcare for women life-threatening  
30  
31 perinatal mental illness are strongly influenced by the professional culture and understanding of  
32  
33 mental illness embedded within different healthcare disciplines. A lack of consensus about what  
34  
35 constitutes a psychiatric maternal near miss resulted in discrepancies in reporting, recording and  
36  
37 learning from such events. There are several clinical implications arising from this study, which  
38  
39 emphasis the need for greater implementation of recommendations made by MBRRACE and the  
40  
41 National Institute for Health and Care Excellence (NICE),<sup>(2, 13)</sup> see Box 1.  
42  
43  
44  
45  
46  
47  
48  
49  
50  
51  
52  
53  
54  
55  
56  
57  
58  
59  
60

## Life-threatening situations in women with perinatal mental illness

**Box 1: Key Implications for Practice**

Based on the findings of this study, and existing NICE guidance and recommendations from the UK maternal deaths enquiry, <sup>(2, 15)</sup> the following recommendations aim to improve the detection and response to life-threatening situations among women with mental illness:

1. **Clear referral thresholds and pathway** – greater clarity and consensus, between all healthcare professionals involved in providing care for perinatal women, about the thresholds and pathways for referral to secondary mental health services during the perinatal period.
2. **Transparent information sharing** – Improved methods of information sharing between primary care, maternity, mental health teams and social services, which use a common language relating to mental health risk.
3. **Ensure continuity of care when possible** – greater implementation of continuity of care models for all healthcare professionals involved in a woman's care during the perinatal period, which clearly state the roles, responsibilities, and plans for dedicated care coordination.
4. **Regular monitoring of women's mental health** – training and support for primary and maternity healthcare professionals around regular monitoring of mental health at all appointments (e.g. when assessing physical health, mental health should also be assessed) to promote dynamic risk assessment and rapid response to deterioration.

To prevent future tragedies, there is a need for greater clarity and consensus about thresholds for referral to secondary mental health services and the role of Midwives and Health Visitors in monitoring women's mental health during the perinatal period. Focusing on how differences in organisational and professional culture contribute to the recognition of severe mental illness and

## Life-threatening situations in women with perinatal mental illness

1  
2  
3 inter-disciplinary communication may help facilitate clearer co-ordination between teams in the  
4  
5 future.  
6  
7  
8  
9

10  
11 **Funding:** Dr Easter is funded through a King's Improvement Science Fellowship award. King's  
12  
13 Improvement Science is part of the NIHR CLAHRC South London and comprises a specialist team of  
14  
15 improvement scientists and senior researchers based at King's College London. Its work is funded by  
16  
17 King's Health Partners (Guy's and St Thomas' NHS Foundation Trust, King's College Hospital NHS  
18  
19 Foundation Trust, King's College London and South London and Maudsley NHS Foundation Trust),  
20  
21 Guy's and St Thomas' Charity, the Maudsley Charity and the Health Foundation. Prof Howard is  
22  
23 funded through a NIHR Research Professorship (NIHR-RP-R3-12-011) in Maternal Mental Health. Prof  
24  
25 Sandall CBE is an NIHR Senior Investigator. Dr Easter and Prof Sandall are supported by the National  
26  
27 Institute for Health Research (NIHR) Collaboration for Leadership in Applied Health Research and  
28  
29 Care South London at King's College Hospital NHS Foundation Trust. The views expressed are those  
30  
31 of the author(s) and not necessarily those of the NHS, the NIHR or the Department of Health and  
32  
33 Social Care.  
34  
35  
36  
37  
38

39 **Acknowledgements:** We would like to thank all healthcare professionals for dedicating their time to  
40  
41 this study and the Section of Women's Mental Health Perinatal Service User Advisory Group for their  
42  
43 contribution to this study.  
44  
45

46 **Competing Interests:** None  
47  
48

49 **Contribution to Authorship:** AE, LH and JS conceived and designed the current study. AE was  
50  
51 responsible for all data collection and primary data analysis; AE, LH and JS contributed to data  
52  
53 interpretation. AE drafted the article which was critically revised by all authors. All authors approved  
54  
55 the final version of the article to be published.  
56  
57  
58  
59  
60



## Life-threatening situations in women with perinatal mental illness

1  
2  
3 **Ethical Approval:** This study was reviewed and approved by King's College London Ethics Committee  
4  
5 (Psychiatry, Nursing and Midwifery Research Ethics Subcommittee); Research Ethics Committee  
6  
7 Reference LRS-16/17-3861 approval granted 12/12/16.  
8  
9

10 **Data sharing statement:** This is a qualitative study and therefore the data generated is not suitable  
11  
12 for sharing beyond that contained within the report. Further information can be obtained from the  
13  
14 corresponding author.  
15  
16

17  
18 **Figure 1: Overview of themes and sub-themes**  
19  
20  
21  
22  
23  
24  
25  
26  
27  
28  
29  
30  
31  
32  
33  
34  
35  
36  
37  
38  
39  
40  
41  
42  
43  
44  
45  
46  
47  
48  
49  
50  
51  
52  
53  
54  
55  
56  
57  
58  
59  
60

## References

1. Howard LM, Molyneaux E, Dennis C-L, Rochat T, Stein A, Milgrom J. Non-psychotic mental disorders in the perinatal period. *The Lancet*. 2014;384(9956):1775-88.
2. Knight M, Bunch K, Tuffnell D, Jayakody H, Shakespeare J, Kotnis R, et al. Saving Lives, Improving Mothers' Care - Lessons learned to inform maternity care from the UK and Ireland Confidential Enquiries into Maternal Deaths and Morbidity 2014-16. University of Oxford 2018; 2018.
3. World Health Organization. Evaluating the quality of care for severe pregnancy complications: the WHO near-miss approach for maternal health. 2011.
4. Tunçalp Ö, Hindin MJ, Souza J, Chou D, Say L. The prevalence of maternal near miss: a systematic review. *BJOG: An International Journal of Obstetrics & Gynaecology*. 2012;119(6):653-61.
5. Royal College of Obstetricians and Gynaecologists. Patterns of maternity care in English NHS hospitals 2011/12: RCOG Press; 2013.
6. Nair M, Kurinczuk JJ, Knight M. Establishing a National Maternal Morbidity Outcome Indicator in England: A Population-Based Study Using Routine Hospital Data. *PloS one*. 2016;11(4):e0153370.
7. Easter A, Howard L, Sandall J. Mental health near miss indicators in maternity care: a missed opportunity? A Commentary. *BJOG: An International Journal of Obstetrics & Gynaecology*. 2017.
8. Braun V, Clarke V. Using thematic analysis in psychology. *Qualitative research in psychology*. 2006;3(2):77-101.
9. Fanjiang G, Grossman JH, Compton WD, Reid PP. Building a better delivery system: a new engineering/health care partnership: National Academies Press; 2005.
10. Thaddeus S, Maine D. Too far to walk: maternal mortality in context. *Social science & medicine*. 1994;38(8):1091-110.
11. Gabrysch S, Campbell OM. Still too far to walk: literature review of the determinants of delivery service use. *BMC pregnancy and childbirth*. 2009;9(1):34.

## Life-threatening situations in women with perinatal mental illness

12. O'Hara MW, Wisner KL. Perinatal mental illness: definition, description and aetiology. *Best Practice & Research Clinical Obstetrics & Gynaecology*. 2014;28(1):3-12.
13. Howard LM, Megnin-Viggars O, Symington I, Group GD. Antenatal and postnatal mental health: summary of updated NICE guidance. *BMJ*. 2014;349:g7394.
14. Oates M. Perinatal psychiatric disorders: a leading cause of maternal morbidity and mortality. *British medical bulletin*. 2003;67(1):219-29.
15. Knight M NM, Tuffnell D, Kenyon S, Shakespeare J, Brocklehurst P, Kurinczuk JJ Oxford: National Perinatal Epidemiology Unit, University of Oxford 2016. *Saving Lives, Improving Mothers' Care - Surveillance of maternal deaths in the UK 2012-14 and lessons learned to inform maternity care from the UK and Ireland Confidential Enquiries into Maternal Deaths and Morbidity 2009-14*. 2015.
16. Knight M, Kenyon S, Brocklehurst P, Neilson J, Shakespeare J, Kurinczuk J. *Saving Lives, Improving Mothers' Care Lessons learned to inform future maternity care from the UK and Ireland Confidential Enquiries into Maternal Deaths and Morbidity 2009-2012*. 2014.
17. Knight M, Nair M, Tuffnell D, Shakespeare J, Kenyon S, Kurinczuk J. *Saving Lives, Improving Mothers' Care Lessons learned to inform future maternity care from the UK and Ireland Confidential Enquiries into Maternal Deaths and Morbidity 2013-2015*. Oxford: National Perinatal Epidemiology Unit, University of Oxford 2017.
18. Littlewood E, Ali S, Dyson L, Keding A, Ansell P, Bailey D, et al. Identifying perinatal depression with case-finding instruments: a mixed-methods study (BaBY PaNDA—Born and Bred in Yorkshire PeriNatal Depression Diagnostic Accuracy). *Health Services and Delivery Research*. 2018.
19. Bauer A, Parsonage M, Knapp M, Lemmi V, Adelaja B. Costs of perinatal mental health problems. 2014.
20. NHS England. 2017 [Available from: <https://www.england.nhs.uk/mental-health/perinatal/>].
21. Button S, Thornton A, Lee S, Shakespeare J, Ayers S. Seeking help for perinatal psychological distress: a meta-synthesis of women's experiences. *Br J Gen Pract*. 2017:bjgp17X692549.

## Life-threatening situations in women with perinatal mental illness

- 1  
2  
3  
4  
5  
6  
7  
8  
9  
10  
11  
12  
13  
14  
15  
16  
17  
18  
19  
20  
21  
22  
23  
24  
25  
26  
27  
28  
29  
30  
31  
32  
33  
34  
35  
36  
37  
38  
39  
40  
41  
42  
43  
44  
45  
46  
47  
48  
49  
50  
51  
52  
53  
54  
55  
56  
57  
58  
59  
60
22. Megnin-Viggars O, Symington I, Howard LM, Pilling S. Experience of care for mental health problems in the antenatal or postnatal period for women in the UK: a systematic review and meta-synthesis of qualitative research. *Archives of women's mental health*. 2015;18(6):745-59.
23. Dennis CL, Chung-Lee L. Postpartum depression help-seeking barriers and maternal treatment preferences: A qualitative systematic review. *Birth*. 2006;33(4):323-31.
24. Carter G, Milner A, McGill K, Pirkis J, Kapur N, Spittal MJ. Predicting suicidal behaviours using clinical instruments: systematic review and meta-analysis of positive predictive values for risk scales. *The British Journal of Psychiatry*. 2017:bjp. bp. 116.182717.
25. National Institute for Health and Care Excellence. NICE Guidelines Self-Harm: Longer Term Management (CG 133). NICE; 2011.

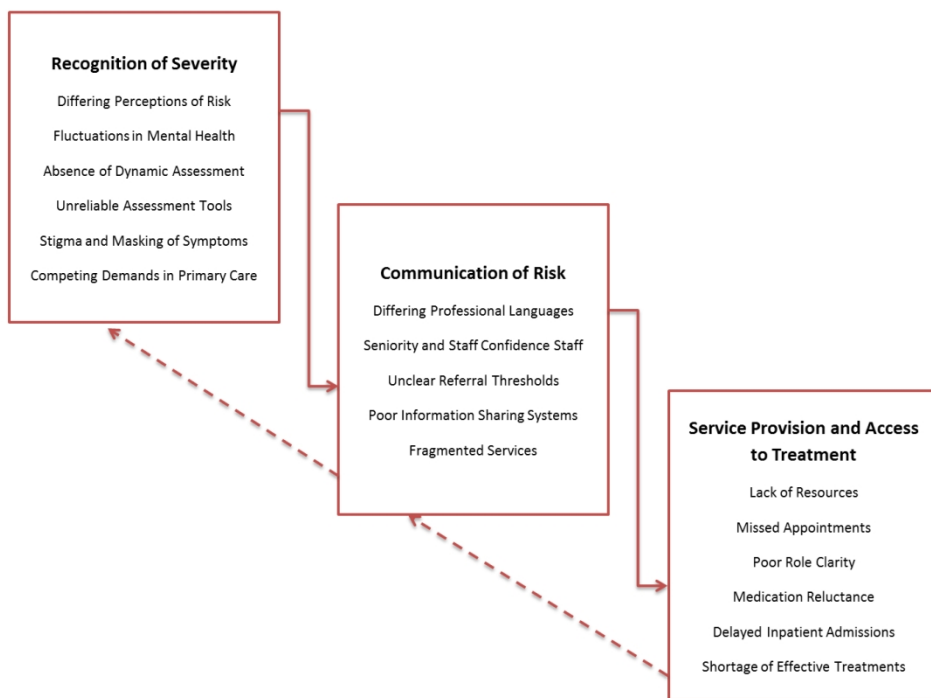

Figure 1: Overview of themes and sub-themes

## Standards for Reporting Qualitative Research (SRQR)\*

<http://www.equator-network.org/reporting-guidelines/srqr/>

Page/line no(s).

### Title and abstract

|                                                                                                                                                                                                                                                              |                   |
|--------------------------------------------------------------------------------------------------------------------------------------------------------------------------------------------------------------------------------------------------------------|-------------------|
| <p><b>Title</b> - Concise description of the nature and topic of the study Identifying the study as qualitative or indicating the approach (e.g., ethnography, grounded theory) or data collection methods (e.g., interview, focus group) is recommended</p> | Page 1/Line 3     |
| <p><b>Abstract</b> - Summary of key elements of the study using the abstract format of the intended publication; typically includes background, purpose, methods, results, and conclusions</p>                                                               | Page 2/Lines 6-56 |

### Introduction

|                                                                                                                                                                     |                    |
|---------------------------------------------------------------------------------------------------------------------------------------------------------------------|--------------------|
| <p><b>Problem formulation</b> - Description and significance of the problem/phenomenon studied; review of relevant theory and empirical work; problem statement</p> | Page 4/Lines 6-41  |
| <p><b>Purpose or research question</b> – Purpose of the study and specific objectives or questions</p>                                                              | Page 4/Lines 39-41 |

### Methods

|                                                                                                                                                                                                                                                                                                                                                                                                             |                                                               |
|-------------------------------------------------------------------------------------------------------------------------------------------------------------------------------------------------------------------------------------------------------------------------------------------------------------------------------------------------------------------------------------------------------------|---------------------------------------------------------------|
| <p><b>Qualitative approach and research paradigm</b> - Qualitative approach (e.g., ethnography, grounded theory, case study, phenomenology, narrative research) and guiding theory if appropriate; identifying the research paradigm (e.g., postpositivist, constructivist/ interpretivist) is also recommended; rationale**</p>                                                                            | Page 4/Lines 50-54<br>Page 5/Lines 40-51<br>Page 6 lines 6-27 |
| <p><b>Researcher characteristics and reflexivity</b> - Researchers' characteristics that may influence the research, including personal attributes, qualifications/experience, relationship with participants, assumptions, and/or presuppositions; potential or actual interaction between researchers' characteristics and the research questions, approach, methods, results, and/or transferability</p> | Page 6/Lines 30-38                                            |
| <p><b>Context</b> - Setting/site and salient contextual factors; rationale**</p>                                                                                                                                                                                                                                                                                                                            | Page 5/Lines 6-17                                             |
| <p><b>Sampling strategy</b> - How and why research participants, documents, or events were selected; criteria for deciding when no further sampling was necessary (e.g., sampling saturation); rationale**</p>                                                                                                                                                                                              | Page 5 /Lines 3-18                                            |
| <p><b>Ethical issues pertaining to human subjects</b> - Documentation of approval by an appropriate ethics review board and participant consent, or explanation for lack thereof; other confidentiality and data security issues</p>                                                                                                                                                                        | Page 5/Lines 20-30                                            |
| <p><b>Data collection methods</b> - Types of data collected; details of data collection procedures including (as appropriate) start and stop dates of data collection and analysis, iterative process, triangulation of sources/methods, and modification of procedures in response to evolving study findings; rationale**</p>                                                                             | Page 5/Lines 40-51                                            |

|                       |                                                                                                                                                                                                                                                       |                                         |
|-----------------------|-------------------------------------------------------------------------------------------------------------------------------------------------------------------------------------------------------------------------------------------------------|-----------------------------------------|
| 1<br>2<br>3<br>4<br>5 | <b>Data collection instruments and technologies</b> - Description of instruments (e.g., interview guides, questionnaires) and devices (e.g., audio recorders) used for data collection; if/how the instrument(s) changed over the course of the study | Page 5/ Lines 40-51                     |
| 6<br>7<br>8           | <b>Units of study</b> - Number and relevant characteristics of participants, documents, or events included in the study; level of participation (could be reported in results)                                                                        | Page 7/Lines 9-50 (Table 1)             |
| 9<br>10<br>11<br>12   | <b>Data processing</b> - Methods for processing data prior to and during analysis, including transcription, data entry, data management and security, verification of data integrity, data coding, and anonymization/de-identification of excerpts    | Page 6/Lines 6-38                       |
| 13<br>14<br>15<br>16  | <b>Data analysis</b> - Process by which inferences, themes, etc., were identified and developed, including the researchers involved in data analysis; usually references a specific paradigm or approach; rationale**                                 | Page 6/Lines 6-38                       |
| 17<br>18<br>19<br>20  | <b>Techniques to enhance trustworthiness</b> - Techniques to enhance trustworthiness and credibility of data analysis (e.g., member checking, audit trail, triangulation); rationale**                                                                | Page 5/Lines 6-16<br>Page 6/Lines 30-38 |

## Results/findings

|                                        |                                                                                                                                                                                                   |                         |
|----------------------------------------|---------------------------------------------------------------------------------------------------------------------------------------------------------------------------------------------------|-------------------------|
| 21<br>22<br>23<br>24<br>25<br>26<br>27 | <b>Synthesis and interpretation</b> - Main findings (e.g., interpretations, inferences, and themes); might include development of a theory or model, or integration with prior research or theory | Pages 15-22<br>Figure 1 |
| 28<br>29<br>30                         | <b>Links to empirical data</b> - Evidence (e.g., quotes, field notes, text excerpts, photographs) to substantiate analytic findings                                                               | Pages 8-13              |

## Discussion

|                                              |                                                                                                                                                                                                                                                                                                                                                                                                             |                                          |
|----------------------------------------------|-------------------------------------------------------------------------------------------------------------------------------------------------------------------------------------------------------------------------------------------------------------------------------------------------------------------------------------------------------------------------------------------------------------|------------------------------------------|
| 31<br>32<br>33<br>34<br>35<br>36<br>37<br>38 | <b>Integration with prior work, implications, transferability, and contribution(s) to the field</b> - Short summary of main findings; explanation of how findings and conclusions connect to, support, elaborate on, or challenge conclusions of earlier scholarship; discussion of scope of application/generalizability; identification of unique contribution(s) to scholarship in a discipline or field | Page 14 Lines 42-55<br>Page 15 line 3-42 |
| 39<br>40<br>41<br>42<br>43                   | <b>Limitations</b> - Trustworthiness and limitations of findings                                                                                                                                                                                                                                                                                                                                            | Page 15/Line 45-56<br>Page 16/Lines 3-38 |

## Other

|                            |                                                                                                                                               |                     |
|----------------------------|-----------------------------------------------------------------------------------------------------------------------------------------------|---------------------|
| 44<br>45<br>46<br>47<br>48 | <b>Conflicts of interest</b> - Potential sources of influence or perceived influence on study conduct and conclusions; how these were managed | Page 17/Lines 42    |
| 49<br>50                   | <b>Funding</b> - Sources of funding and other support; role of funders in data collection, interpretation, and reporting                      | Page 17/Lines 11-32 |

\*The authors created the SRQR by searching the literature to identify guidelines, reporting standards, and critical appraisal criteria for qualitative research; reviewing the reference lists of retrieved sources; and contacting experts to gain feedback. The SRQR aims to improve the transparency of all aspects of qualitative research by providing clear standards for reporting qualitative research.

1  
2  
3 \*\*The rationale should briefly discuss the justification for choosing that theory, approach,  
4 method, or technique rather than other options available, the assumptions and limitations  
5 implicit in those choices, and how those choices influence study conclusions and  
6 transferability. As appropriate, the rationale for several items might be discussed together.  
7

8 **Reference:**

9 O'Brien BC, Harris IB, Beckman TJ, Reed DA, Cook DA. **Standards for reporting qualitative**  
10 **research: a synthesis of recommendations.** *Academic Medicine*, Vol. 89, No. 9 / Sept 2014  
11 DOI: [10.1097/ACM.0000000000000388](https://doi.org/10.1097/ACM.0000000000000388)  
12  
13  
14  
15  
16  
17  
18  
19  
20  
21  
22  
23  
24  
25  
26  
27  
28  
29  
30  
31  
32  
33  
34  
35  
36  
37  
38  
39  
40  
41  
42  
43  
44  
45  
46  
47  
48  
49  
50  
51  
52  
53  
54  
55  
56  
57  
58  
59  
60

For peer review only



# BMJ Open

## Recognition and response to life-threatening situations among women with perinatal mental illness: A qualitative study

|                                 |                                                                                                                                                                                                                                                                                                                      |
|---------------------------------|----------------------------------------------------------------------------------------------------------------------------------------------------------------------------------------------------------------------------------------------------------------------------------------------------------------------|
| Journal:                        | <i>BMJ Open</i>                                                                                                                                                                                                                                                                                                      |
| Manuscript ID                   | bmjopen-2018-025872.R2                                                                                                                                                                                                                                                                                               |
| Article Type:                   | Research                                                                                                                                                                                                                                                                                                             |
| Date Submitted by the Author:   | 06-Feb-2019                                                                                                                                                                                                                                                                                                          |
| Complete List of Authors:       | Easter, Abigail; King's College London, Institute of Psychiatry, Psychology and Neuroscience, Health Service and Population Research Department<br>Howard, Louise; institute of psychiatry, health service and population research<br>Sandall, Jane; Kings College, London, Health and Social Care Research Division |
| <b>Primary Subject Heading</b>: | Mental health                                                                                                                                                                                                                                                                                                        |
| Secondary Subject Heading:      | Mental health, Obstetrics and gynaecology, Qualitative research, Emergency medicine                                                                                                                                                                                                                                  |
| Keywords:                       | QUALITATIVE RESEARCH, Perinatal Mental Health, MENTAL HEALTH, Maternal Mortality, Near Miss                                                                                                                                                                                                                          |
|                                 |                                                                                                                                                                                                                                                                                                                      |

SCHOLARONE™  
Manuscripts

1  
2  
3 **Recognition and response to life-threatening situations among women with perinatal mental**  
4  
5 **illness: A qualitative study**  
6  
7

8 A. Easter,<sup>1</sup> L.M Howard,<sup>2</sup> J. Sandall<sup>3</sup>  
9  
10

- 11  
12  
13  
14  
15 1. Centre for Implementation Science, Health Service Research and Population Department,  
16 Institute of Psychiatry, Psychology and Neuroscience, King's College London, London, UK  
17  
18 2. Section of Women's Mental Health, Health Service Research and Population Department,  
19 Institute of Psychiatry, Psychology and Neuroscience, King's College London, London, UK  
20  
21 3. Department of Women and Children's Health, King's College London, St Thomas' Hospital,  
22 London, UK  
23  
24  
25  
26  
27  
28  
29  
30  
31

32 **Correspondence to Dr Abigail Easter**  
33

34  
35 Address Centre for Implementation Science, Health Service Research and Population Department,  
36 Institute of Psychiatry, Psychology and Neuroscience, King's College London, PO25, David  
37 Goldberg Centre, De Crespigny Park, London, SE5 8AF  
38  
39

40  
41  
42 Email: abigail.easter@kcl.ac.uk  
43  
44

45  
46 Telephone: 020 7 848 5548  
47  
48  
49  
50  
51  
52  
53  
54  
55  
56  
57  
58  
59  
60

## Life-threatening situations in women with perinatal mental illness

**Abstract**

**Objective:** Mental illness has persistently been found to be a leading cause of death during pregnancy and the year after birth (the perinatal period). This study aims to explore barriers to detection, response and escalation of mental health related life-threatening near miss events among women with perinatal mental illness.

**Design:** Qualitative study

**Participants:** Healthcare professionals (HCP) working in psychiatry, maternity and primary care (n=15) across community and hospital maternity and perinatal services within the UK.

**Methods:** In-depth semi-structured interviews were conducted with a range of healthcare professionals working with women during the perinatal period. An iterative process of inductive and deductive thematic analysis, informed by systems theories of healthcare and the Three Delays Model, was employed to analyse the data.

**Results:** Three overarching themes were identified: recognition of severity, communication of risk, and service provision and access to treatment. Differing perspectives of mental illness severity influenced how life-threatening situations among women with perinatal mental illness were described, recognised and communicated between teams. Under-resourced mental health service provision, particularly within emergency and specialist perinatal mental health services, unclear thresholds for escalating care and poor infrastructure for sharing information all contributed to delays in a timely response to crisis situations. Reluctance to prescribe medication or admit women to psychiatric hospital, stigma, and missed appointments created further delays.

**Conclusions:** Several complex and inter-related healthcare barriers to detection, response and escalation of care for potentially life-threatening situations among women with perinatal mental

## Life-threatening situations in women with perinatal mental illness

1  
2  
3 illness exist. Focusing on how differences in organisational and professional culture contribute to the  
4  
5 recognition of severe mental illness and inter-disciplinary communication may help facilitate clearer  
6  
7 co-ordination between teams.  
8  
9

**Strengths and Limitations of the study**

- 14 • This is the first study to explore maternal near misses among women with a range of  
15 perinatal mental illnesses, which identifies several important barriers to detection &  
16 response of life-threatening situations among women with perinatal mental illness.  
17  
18
- 20 • As a small explorative qualitative study of healthcare professionals in the UK the study  
21 findings may not be generalizable to other settings.  
22  
23
- 25 • Women's perspectives are not explored within this study.  
26  
27  
28  
29

30 **Key words:** Qualitative, Perinatal Mental Health, Maternal Mortality, Near Miss  
31  
32  
33  
34  
35  
36  
37  
38  
39  
40  
41  
42  
43  
44  
45  
46  
47  
48  
49  
50  
51  
52  
53  
54  
55  
56  
57  
58  
59  
60

## Life-threatening situations in women with perinatal mental illness

**Introduction**

Mental illness is common during pregnancy and the first year postpartum (the perinatal period), with major depression or anxiety affecting approximately 10% of women.<sup>(1)</sup> Recent confidential enquiries into maternal deaths in the UK suggest that approximately a quarter (24%) of women who died between 2014-16 had a mental illness and 1 in 5 women died from suicide in the year following birth.<sup>(2)</sup> As such, maternal suicide is the third largest cause of direct maternal deaths occurring during or within 42 days of the end of pregnancy. However, it remains the leading cause of direct deaths occurring within a year after the end of pregnancy, with a mortality rate of 2.8 per 100,000 maternities.

A near miss approach can be a valuable method for studying the processes in place for recognising and responding to clinical deterioration, and has been widely adopted to study severe maternal morbidity.<sup>(3, 4)</sup> A maternal near miss is typically defined as 'severe life-threatening complications not resulting in death'.<sup>(4)</sup> Several tools for identifying maternal near misses exist,<sup>(3, 5, 6)</sup> yet despite the high mortality in perinatal period relating to mental rather than physical health they focus almost entirely on clinical indicators of physical health with limited consideration of mental health.<sup>(7)</sup>

This represents a significant research gap, since current approaches to investigating maternal morbidity and mortality rely upon identifying preceding clinical characteristics associated with a worsening of condition. Developing strategies to identify women at risk of life-threatening mental illness is therefore of clear clinical importance in order to ensure that timely and appropriate intervention are available to those at greatest risk.

The purpose of this study is to explore potential barriers to detection, response and escalation of mental health related life-threatening events among women with perinatal mental illness.

## Methods

### *Design*

Given the absence of prior research into psychiatric maternal near miss events, an exploratory qualitative study, utilising in-depth semi-structured interviews with healthcare professionals (HCP), was adopted. Patient safety incidence, such as near miss events, are often under-reported therefore qualitative methodology may also be useful to explore in-depth the potential complexity of the barriers surrounding detection and response to maternal near miss events.

### *Participants and Setting*

This UK based study aimed to recruit a sample of HCP working with women with mental illness during the perinatal period (i.e. during pregnancy and up to the first-year post birth).

Purposeful and convenience sampling were used to recruit a national sample of HCP from five different healthcare disciplines ( i.e. Psychiatry, Psychology, Midwifery, Obstetrics, and Health Visiting), across a range of healthcare settings (i.e. inpatient, outpatient and community teams). Rigour and transferability were optimised by sampling respondents with differing characteristics.

Two main recruitment methods were utilised. First, convenience sampling was used to identify potential participants via direct emails to professional mailing lists and promotion of the study to professional groups via social media (i.e. Twitter and Facebook). Second, purposeful sampling (based on healthcare discipline and setting, and geographical location in the UK) was adopted to identify and directly email potential participants that were not represented in the first round of sampling.

Interested participants received an information sheet and were offered the opportunity to discuss the study; those agreeing to participate provided written informed consent prior to the interview.

Recruitment to the study was concurrent with data analysis, and data collection proceeded until no

## Life-threatening situations in women with perinatal mental illness

1  
2  
3 further unique themes were identified in successive interviews (saturation). Although there is no  
4  
5 agreed method for establishing data saturation, after 15 interviews a range of HCP experiences had  
6  
7 been captured, and it was felt that no new themes were emerging and data saturation was reached.  
8  
9

### 10 *Data Collection*

11  
12  
13 Interviews were semi-structured and followed a topic guide. Questions were open-ended and  
14  
15 iteratively revised following initial interviews to allow further exploration of the issues that arose.  
16  
17

18 Due to differing definitions of near misses across different disciplines, following a brief exploration of  
19  
20 what HCP thought of as a psychiatric near miss event, they were directed to focus on situations that  
21  
22 they thought were life-threatening to the service user involved. All interviews were undertaken by  
23  
24 one researcher (AE), by phone or face to face. Interviews were audio recorded and transcribed  
25  
26 verbatim.  
27  
28

### 29 *Data Analysis*

30  
31  
32 Data were managed using qualitative software, NVIVO V.11. An iterative process of inductive and  
33  
34 deductive thematic analysis, as described by Braun and Clarke, was used to identify common themes  
35  
36 in the data.<sup>(8)</sup> AE read the transcripts several times to become immersed in the data. Initial line-by-  
37  
38 line inductive coding was conducted, before grouping meaningful sub-themes into overarching  
39  
40 themes. Grouping of themes and sub-themes was informed by two key theories, outlined below, to  
41  
42 facilitate a more in-depth understanding of barriers to detection and response from a healthcare  
43  
44 systems perspective, rather than solely focusing on individual level barriers. The emerging themes  
45  
46 were used to modify the interview schedule and inform subsequent interviews and analysis.  
47  
48  
49  
50

### 51 *Theoretical Underpinnings*

52  
53  
54 Data analysis and interpretation was informed by Systems Theories of healthcare,<sup>(9)</sup> and the 'Three  
55  
56 Delays Model'.<sup>(10, 11)</sup>  
57  
58  
59  
60

## Life-threatening situations in women with perinatal mental illness

1  
2  
3 General systems theory, views healthcare practices within the context of a complex and interacting  
4 system. It asserts that individuals (e.g. patients, families, healthcare professionals) do not act in  
5 isolation; and therefore can only be understood by exploring the healthcare system as a whole and  
6 how different levels of the system interact. Factors that contribute to the healthcare system have  
7 been conceptualised as the interplay between three fundamental levels: micro (e.g. individual  
8 patients and healthcare professionals and their interactions), meso (e.g. the organisational context)  
9 and macro (e.g. wider healthcare systems and political context).

10  
11  
12 The three delays model was originally proposed to help facilitate understanding of the factors that  
13 prevent or delay women from accessing safe maternity care. Delays are proposed to occur at three  
14 key points: 1) delay in seeking care; 2) delay in reaching care, and 3) delay in receiving care once at  
15 an appropriate healthcare facility. The model has been used in a variety of international settings to  
16 help understand healthcare factors relating to maternal and perinatal mortality, and implement  
17 targeted changes in healthcare systems.

18  
19  
20 These theories were used to help structure the topic guide and help facilitate exploration of  
21 potential barriers at different levels of the healthcare system (e.g. micro, meso and macro) and  
22 within a woman's care pathway. To draw out the complexity relating to the number of healthcare  
23 professionals and disciplines involved in women's perinatal mental healthcare the analysis focused  
24 on desalinating differing perceptions between HCP.

25  
26  
27 All authors discussed the initial coding framework and emerging themes to ensure that alternative  
28 viewpoints had been considered, reviewed the thematic labels applied and agree on the final  
29 overarching and sub-themes. This process helped to highlight alternative interpretations, which  
30 were reflective of the different academic and clinical background (maternity, psychiatry and  
31 psychology) of the research team.

### 32 33 34 **Patient and Public Involvement**



## Life-threatening situations in women with perinatal mental illness

1  
2  
3 Feedback on the preliminary findings from the thematic analysis was sought from a patient and  
4 public involvement (PPI) group consisting of women, and family members, with lived experience of  
5 perinatal mental illness. Discussions held with the PPI group helped to refine the labels assigned to  
6 codes and themes, and their descriptions as presented in this manuscript. In addition, they have  
7 helped to identify areas for future research studies to further understanding of the support needs of  
8 women and families.  
9  
10  
11  
12  
13  
14  
15  
16  
17  
18  
19  
20  
21  
22  
23  
24  
25  
26  
27  
28  
29  
30  
31  
32  
33  
34  
35  
36  
37  
38  
39  
40  
41  
42  
43  
44  
45  
46  
47  
48  
49  
50  
51  
52  
53  
54  
55  
56  
57  
58  
59  
60

For peer review only

## Results

### *Participants*

A total of 15 HCP participated in the current study: 5 psychiatrists, 5 midwives, 2 health visitors, 1 General Practitioner, 1 psychologist and 1 obstetrician. Participants were recruited from the following regions: East of England (n=3), London (n=4), North East England (n=2) South East England (n=1), South West England (n=1), the West Midlands (n=2), Yorkshire and Humber (n=1), Wales (n=1). Five participants were recruited via social media, four responded to mailing lists and six were purposefully recruited via direct email. Participant characteristics are shown in Table 1.

**Table 1: Characteristics of Interview Participants**

| Participant Number | Gender | Profession           | Setting                                  |
|--------------------|--------|----------------------|------------------------------------------|
| 01                 | F      | Psychiatrist         | Community Perinatal Psychiatry           |
| 02                 | M      | Psychiatrist         | Adult Psychiatry                         |
| 03                 | M      | Psychiatrist         | Inpatient Mother and Baby Hospital       |
| 04                 | F      | Midwife              | Community Midwifery                      |
| 05                 | F      | Psychiatrist         | Inpatient/Community Perinatal Psychiatry |
| 06                 | F      | General Practitioner | General Practice                         |
| 07                 | F      | Midwife              | Community Midwifery/Maternity Hospital   |
| 08                 | F      | Health Visitor       | Community Health Visiting/Management     |
| 09                 | F      | Psychologist         | Outpatients Clinic                       |
| 10                 | F      | Midwife              | Community Midwifery/Management           |
| 11                 | F      | Psychiatrist         | Community Perinatal Psychiatry           |
| 12                 | F      | Obstetrician         | Maternity Hospital                       |

## Life-threatening situations in women with perinatal mental illness

|    |   |                 |                                        |
|----|---|-----------------|----------------------------------------|
| 13 | F | Health Visiting | Community Health Visiting              |
| 14 | F | Midwife         | Community Midwifery/Maternity Hospital |
| 15 | F | Midwife         | Community Midwifery                    |

*Inconsistent Definitions and Criteria*

There was considerable inconsistency in how HCP conceptualised a maternal near miss or life-threatening event relating to mental health, which was driven by different definitions in use across the specialisms. The most typical examples were attempted suicides, although self-harm, harm to others and severe mental health relapses were also discussed.

As depicted in Figure 1, barriers to identifying and responding to a potentially life-threatening event in mental health occurred at three levels of the healthcare system: recognition of severity, communication of risk and service provision and access to treatment.

**Figure 1 here****1. Recognition of Severity***Differing Perceptions of Risk*

A primary requisite to providing appropriate and timely mental health treatment is the ability to accurately determine the severity of a woman's symptoms and level of risk. However, differing perception of risk and illness severity across healthcare disciplines acted as a key barrier to identifying the level of mental health assessment or treatment a woman needed. This impacted on detection and response to potentially life-threatening situations in two ways. Perinatal Psychiatrists described situations where they felt that primary HCP (i.e. midwives, health visitors and general practitioners) and non-perinatal psychiatry teams had underestimated the level of risk of a situation, which contributed to delays in accessing specialist care.

## Life-threatening situations in women with perinatal mental illness

1  
2  
3 *“...she was someone who in the first two weeks postnatally she'd been referred to the CMHT*  
4 *[Community Mental Health Team] ... but, because she wasn't referred urgently (the GP was just a bit*  
5 *concerned) and she was sent an appointment, but by that time she'd already jumped [off a high*  
6 *building ...but survived].” (Perinatal Psychiatrist)*  
7  
8  
9  
10  
11  
12

13 By comparison, primary HCP frequently expressed difficulties escalating care for women that they  
14 perceived to be at risk of a life-threatening event when their concerns were not shared by mental  
15 health teams. This was most often described within the context of self-harm and created uncertainty  
16 about whether self-harm represented a risk of a more life-threatening injury and frustration about a  
17 lack of prioritisation of such cases.  
18  
19  
20  
21  
22  
23  
24

25 *“Maybe in their world of mental health it's not so bad. Obviously for me, from my perspective we've*  
26 *got a woman who is doing that [harming] to herself and God knows what else she could do”*  
27  
28

29  
30 *(Midwife)*  
31

### 32 *Fluctuations in Mental Illness*

33  
34

35 Unlike many physical illnesses, which typically have a more linear deterioration prior to a maternal  
36 near miss, symptoms of mental illness and levels of risk can fluctuate over time, sometimes very  
37 rapidly.<sup>(12)</sup> Fluctuation in symptom severity was identified as a fundamental challenge when trying to  
38 identify women at risk of a life-threatening event before it occurred.  
39  
40  
41  
42  
43  
44

45 *“...so in actual fact we assessed her as being relatively low risk but ... she had just had a visit from*  
46 *her family which had been quite a distressing visit which had obviously changed the risk... In*  
47 *retrospect we didn't respond appropriately to that.” (Perinatal Psychiatrist)*  
48  
49  
50  
51  
52

53 Midwives and Health Visitors highlighted that this lack of regular enquiry about a woman's mental  
54 health status throughout the perinatal period also created barriers to recognising signs of  
55 deterioration. Competing role demands sometimes meant that a woman's mental health or  
56 wellbeing may not be asked about at each visit unless there was cause for concern. This was  
57  
58  
59  
60

## Life-threatening situations in women with perinatal mental illness

1  
2  
3 compounded by a lack of continuity of care, resulting in midwives being less able to detect changes  
4  
5 in a woman's mental health.  
6  
7

8 *"...it's based on booking, so unless the woman actually comes back and says, "Do you know what?*  
9  
10 *I'm not feeling very well, I'm not doing very well," it won't be necessarily revisited again during*  
11  
12 *pregnancy and also postnatally. "(Midwife)*

### 13 14 15 16 *Risk Assessment Tools*

17  
18 Although HCP described tools available to assess women's risk or symptom severity, it was apparent  
19  
20 that these tools were not reliable or regularly implemented. In some cases this led to disagreements  
21  
22 among clinicians about the level of risk woman was presenting with, and contributed to difficulties in  
23  
24 communicating risk between teams.  
25  
26

27  
28 *"...we really just use a standard clinical interview really to find out what they are telling us and what*  
29  
30 *we work out from psychiatric examination to tell us how risky they actually are. There isn't really a*  
31  
32 *standardized tool which works, I don't think." (Psychiatrist)*  
33  
34

## 35 36 **2. Communication of Risk**

37  
38 During the perinatal period a range of HCP are involved in women's care, communication within and  
39  
40 between teams is therefore paramount to recognising and responding to high risk situations,  
41  
42 however several communication barriers were identified.  
43  
44  
45

### 46 47 *Differing Professional Languages*

48  
49 Health Visitors and Midwives spoke about difficulties communicating symptoms and deterioration of  
50  
51 mental illness to mental health teams, commenting that it felt as if they 'spoke different languages'.  
52  
53 Primary care staff felt that their training and professional background did not adequately equip them  
54  
55 to convey concerns about a mothers' mental health or accurately describe particular symptoms. In  
56  
57  
58  
59  
60

## Life-threatening situations in women with perinatal mental illness

1  
2  
3 some cases this resulted in several re-referrals to mental health services, potentially creating delays  
4  
5 to receiving care.  
6  
7

8  
9 *"...what I used to find is that health visitors would have an issue, a concern, and ring the mental*  
10 *health services, but because they weren't really clear about what they were saying or what they were*  
11 *doing so they would say, "Well, it wasn't accepted." I'd say, 'Right, ring back and say this [...] and*  
12 *give them the language. And then once you did that, the referral was accepted. It's something about*  
13 *the language and the culture that each profession uses as well that makes it more likely that a*  
14 *woman will be seen appropriately." (Health Visitor)*  
15  
16  
17  
18  
19  
20  
21  
22

23 This appeared to be compounded by a lack of confidence among junior primary care staff about  
24 communicating with specialist mental health teams in relation to illnesses outside of their discipline,  
25 whereas support from senior staff helped facilitate these conversations.  
26  
27  
28  
29

### 30 *Unclear Referral Thresholds*

31  
32  
33 During the perinatal period clinical guidance in the UK recommends a lower threshold for referral  
34 and intervention for mental illness.<sup>(13)</sup> However, healthcare professionals often described a sense of  
35 confusion and frustration about what symptoms would constitute a referral being accepted by  
36 secondary mental health teams. This was strongly related to themes of differing perceptions of  
37 severity between specialisms and difficulties communicating levels of risk in referral forms. Midwives  
38 and Health Visitors often felt that thresholds for secondary mental health services were too high,  
39 which led to referrals not being accepted and left primary healthcare professionals unsure of how to  
40 manage the mental healthcare of such women.  
41  
42  
43  
44  
45  
46  
47  
48  
49  
50

51  
52 *"...we are working very much and saying if they have got these pre-existing conditions that the*  
53 *referral needs to go in and it needs to bypass the lower level of support. It needs to go straight*  
54 *through to the secondary levels so that the Perinatal Team will pick it up. But it's just very difficult to*  
55 *write the referral so that you can get it through to meet those thresholds." (Midwife)*  
56  
57  
58  
59  
60

## Life-threatening situations in women with perinatal mental illness

1  
2  
3 By comparison, Psychiatrists sometimes expressed frustration in the number of 'inappropriate'  
4 referrals to mental health services, which they had limited capacity to manage.  
5  
6  
7

8 *"On the referral form, we've got risk assessments, suicide risk or self-harm, we particularly*  
9 *highlighted them you could see that. The problem is ... we've had women who've taken an overdose*  
10 *10 years ago and then the nurses, the midwives read that and they put the highest score for suicide*  
11 *risk and actually it's very historical."* (Psychiatrist)  
12  
13  
14  
15  
16

### 17 *Poor Information Sharing and Fragmented Services*

18  
19  
20  
21 The ability to communicate risks and concerns between different health and social care  
22 professionals involved in women's care was also impacted by a lack of integrated clinical records.  
23  
24  
25  
26 HCP often spoke about managing the care of a woman but not being fully aware of involvement  
27 from other services, sometimes having to rely upon women to provide information about their care.  
28  
29

30  
31 *"I find that because we all have different IT systems where we keep our records, nothing speaks to*  
32 *each other; we don't have access to each other's records [...] I think that there are issues with that*  
33 *about the fact we can't see what Mental Health have written, Mental Health can't see what we're*  
34 *writing, Social Care can't see what any of us are writing."* (Midwife)  
35  
36  
37  
38  
39

### 40 **3. Service Provision and Access to Treatment**

#### 41 *Lack of Resources*

42  
43  
44  
45  
46  
47 A key theme from all interviews that contributed to missed opportunities for care among women  
48 with potentially life-threatening illnesses was a lack of resources for mental health service provision,  
49 which affected the capacity for response to high risk situations. In addition, a lack of appropriate  
50  
51  
52  
53  
54  
55  
56  
57  
58  
59  
60  
61  
62  
63  
64  
65  
66  
67  
68  
69  
70  
71  
72  
73  
74  
75  
76  
77  
78  
79  
80  
81  
82  
83  
84  
85  
86  
87  
88  
89  
90  
91  
92  
93  
94  
95  
96  
97  
98  
99  
100  
101  
102  
103  
104  
105  
106  
107  
108  
109  
110  
111  
112  
113  
114  
115  
116  
117  
118  
119  
120  
121  
122  
123  
124  
125  
126  
127  
128  
129  
130  
131  
132  
133  
134  
135  
136  
137  
138  
139  
140  
141  
142  
143  
144  
145  
146  
147  
148  
149  
150  
151  
152  
153  
154  
155  
156  
157  
158  
159  
160  
161  
162  
163  
164  
165  
166  
167  
168  
169  
170  
171  
172  
173  
174  
175  
176  
177  
178  
179  
180  
181  
182  
183  
184  
185  
186  
187  
188  
189  
190  
191  
192  
193  
194  
195  
196  
197  
198  
199  
200  
201  
202  
203  
204  
205  
206  
207  
208  
209  
210  
211  
212  
213  
214  
215  
216  
217  
218  
219  
220  
221  
222  
223  
224  
225  
226  
227  
228  
229  
230  
231  
232  
233  
234  
235  
236  
237  
238  
239  
240  
241  
242  
243  
244  
245  
246  
247  
248  
249  
250  
251  
252  
253  
254  
255  
256  
257  
258  
259  
260  
261  
262  
263  
264  
265  
266  
267  
268  
269  
270  
271  
272  
273  
274  
275  
276  
277  
278  
279  
280  
281  
282  
283  
284  
285  
286  
287  
288  
289  
290  
291  
292  
293  
294  
295  
296  
297  
298  
299  
300  
301  
302  
303  
304  
305  
306  
307  
308  
309  
310  
311  
312  
313  
314  
315  
316  
317  
318  
319  
320  
321  
322  
323  
324  
325  
326  
327  
328  
329  
330  
331  
332  
333  
334  
335  
336  
337  
338  
339  
340  
341  
342  
343  
344  
345  
346  
347  
348  
349  
350  
351  
352  
353  
354  
355  
356  
357  
358  
359  
360  
361  
362  
363  
364  
365  
366  
367  
368  
369  
370  
371  
372  
373  
374  
375  
376  
377  
378  
379  
380  
381  
382  
383  
384  
385  
386  
387  
388  
389  
390  
391  
392  
393  
394  
395  
396  
397  
398  
399  
400  
401  
402  
403  
404  
405  
406  
407  
408  
409  
410  
411  
412  
413  
414  
415  
416  
417  
418  
419  
420  
421  
422  
423  
424  
425  
426  
427  
428  
429  
430  
431  
432  
433  
434  
435  
436  
437  
438  
439  
440  
441  
442  
443  
444  
445  
446  
447  
448  
449  
450  
451  
452  
453  
454  
455  
456  
457  
458  
459  
460  
461  
462  
463  
464  
465  
466  
467  
468  
469  
470  
471  
472  
473  
474  
475  
476  
477  
478  
479  
480  
481  
482  
483  
484  
485  
486  
487  
488  
489  
490  
491  
492  
493  
494  
495  
496  
497  
498  
499  
500  
501  
502  
503  
504  
505  
506  
507  
508  
509  
510  
511  
512  
513  
514  
515  
516  
517  
518  
519  
520  
521  
522  
523  
524  
525  
526  
527  
528  
529  
530  
531  
532  
533  
534  
535  
536  
537  
538  
539  
540  
541  
542  
543  
544  
545  
546  
547  
548  
549  
550  
551  
552  
553  
554  
555  
556  
557  
558  
559  
560  
561  
562  
563  
564  
565  
566  
567  
568  
569  
570  
571  
572  
573  
574  
575  
576  
577  
578  
579  
580  
581  
582  
583  
584  
585  
586  
587  
588  
589  
590  
591  
592  
593  
594  
595  
596  
597  
598  
599  
600  
601  
602  
603  
604  
605  
606  
607  
608  
609  
610  
611  
612  
613  
614  
615  
616  
617  
618  
619  
620  
621  
622  
623  
624  
625  
626  
627  
628  
629  
630  
631  
632  
633  
634  
635  
636  
637  
638  
639  
640  
641  
642  
643  
644  
645  
646  
647  
648  
649  
650  
651  
652  
653  
654  
655  
656  
657  
658  
659  
660  
661  
662  
663  
664  
665  
666  
667  
668  
669  
670  
671  
672  
673  
674  
675  
676  
677  
678  
679  
680  
681  
682  
683  
684  
685  
686  
687  
688  
689  
690  
691  
692  
693  
694  
695  
696  
697  
698  
699  
700  
701  
702  
703  
704  
705  
706  
707  
708  
709  
710  
711  
712  
713  
714  
715  
716  
717  
718  
719  
720  
721  
722  
723  
724  
725  
726  
727  
728  
729  
730  
731  
732  
733  
734  
735  
736  
737  
738  
739  
740  
741  
742  
743  
744  
745  
746  
747  
748  
749  
750  
751  
752  
753  
754  
755  
756  
757  
758  
759  
760  
761  
762  
763  
764  
765  
766  
767  
768  
769  
770  
771  
772  
773  
774  
775  
776  
777  
778  
779  
780  
781  
782  
783  
784  
785  
786  
787  
788  
789  
790  
791  
792  
793  
794  
795  
796  
797  
798  
799  
800  
801  
802  
803  
804  
805  
806  
807  
808  
809  
810  
811  
812  
813  
814  
815  
816  
817  
818  
819  
820  
821  
822  
823  
824  
825  
826  
827  
828  
829  
830  
831  
832  
833  
834  
835  
836  
837  
838  
839  
840  
841  
842  
843  
844  
845  
846  
847  
848  
849  
850  
851  
852  
853  
854  
855  
856  
857  
858  
859  
860  
861  
862  
863  
864  
865  
866  
867  
868  
869  
870  
871  
872  
873  
874  
875  
876  
877  
878  
879  
880  
881  
882  
883  
884  
885  
886  
887  
888  
889  
890  
891  
892  
893  
894  
895  
896  
897  
898  
899  
900  
901  
902  
903  
904  
905  
906  
907  
908  
909  
910  
911  
912  
913  
914  
915  
916  
917  
918  
919  
920  
921  
922  
923  
924  
925  
926  
927  
928  
929  
930  
931  
932  
933  
934  
935  
936  
937  
938  
939  
940  
941  
942  
943  
944  
945  
946  
947  
948  
949  
950  
951  
952  
953  
954  
955  
956  
957  
958  
959  
960  
961  
962  
963  
964  
965  
966  
967  
968  
969  
970  
971  
972  
973  
974  
975  
976  
977  
978  
979  
980  
981  
982  
983  
984  
985  
986  
987  
988  
989  
990  
991  
992  
993  
994  
995  
996  
997  
998  
999  
1000

## Life-threatening situations in women with perinatal mental illness

1  
2  
3 facilities for a mental health crisis, particularly during pregnancy, and highlighted women's  
4  
5 reluctance to attend A&E for their mental health.  
6  
7

8 *"In terms of getting the crisis team to attend or getting the GP to attend out of hours has always*  
9 *been... well a bit fraught really and not knowing who to ring for the best and the crisis team saying,*  
10 *"Yes, can send someone but it's going to be six hours, which isn't exactly considered a crisis."* (Health  
11  
12  
13  
14  
15 Visitor)

### 16 17 18 Medication Reluctance

19  
20  
21 It was apparent from some interviews that a reluctance to prescribe psychotropic medication or to  
22  
23 recommend an inpatient admission during the perinatal period was also a factor that affected the  
24  
25 type of treatment women received for mental illness during pregnancy or during early motherhood.  
26  
27 Other interviews emphasised the role of the women and families in deciding to stop medication  
28  
29 during the perinatal period which was felt to contribute to deterioration in mental health.  
30  
31

32  
33 *"Sometimes there is sort of a resistance from psychiatry services to up medication and be*  
34 *more aggressive with it so that you can actually try and sort out the medical problem."*  
35  
36

37  
38 (Obstetrician)  
39  
40

### 41 Missed Appointments

42  
43  
44 HCP also spoke about how a perceived stigma and fear of social service involvement led to women  
45  
46 *"masking their symptoms"* from clinical staff or not attending clinical appointments, which created  
47  
48 additional difficulties in spotting early warning signs.  
49  
50

51 *"It's the woman who don't attend or don't disclose, I think they're most at risk groups [...]*  
52  
53 *The women that I do see in the clinic are the ones at least I'm worried about, it's those I'm*  
54  
55 *not seeing are the ones I'm most worried about."* (Psychiatrist)  
56  
57  
58  
59  
60



## Life-threatening situations in women with perinatal mental illness

*Poor Role Clarity*

Several HCP also highlighted that poor role clarity was also a factor that contributed to women deemed at risk of a life-threatening event not receiving an appropriate level of treatment. This was particularly the case in situations where a woman was currently well, but at high risk of relapse or severe mental illness in the postpartum period, which created confusion over whose role it was to monitor the well-being of a woman and escalate care if necessary.

*“She doesn’t get accepted (for mental health treatment) and then the response from perinatal is for the midwife to monitor and the GP to monitor. I came back and said, “There’s (so few) midwives in the team, and what exactly is this midwife, who is a midwife, monitoring? What exactly do want her to monitor? Secondly, what is this about the GP? Don’t we understand how GP’s work?” Monitor what? [...] “What do you mean monitor?” Midwives are there to monitor the pregnancy, but we are not mental health nurses, we are not psychiatrists.” (Midwife)*

Psychiatrists described discharging women to the primary care staff who did not meet the threshold for specialist mental health services, but required closer monitoring and support. However, primary care staff often expressed feeling unclear or ill-equipped in their role and how to monitor the mental healthcare of these women. Some midwives perceived the mental health of the women they were managing to be too severe or high risk and warranted greater support from mental health specialists; highlighting a lack of middle tier mental health services to monitor and support women who may be at risk of deterioration.

**Discussion**

Accurate identification and treatment of mental illnesses that may become life threatening during the perinatal period is an important quality and safety issue and crucial to reducing the maternal death rate.<sup>(14, 15)</sup> This study illustrates several inter-related barriers to detection, response and escalation of mental health care in potentially life-threatening situations that occur at all levels of

## Life-threatening situations in women with perinatal mental illness

1  
2  
3 the healthcare system. Differing perceptions of risk and severity of mental illness between the  
4  
5 various HCP involved in a woman's perinatal care had significant consequences for how situations  
6  
7 were interpreted and communicated between teams. In many cases, these barriers to  
8  
9 communication were further compounded by a perception of a lack of reliable tools to assess risk,  
10  
11 unclear thresholds for escalating care and poor infrastructure for sharing information.  
12  
13

14  
15 These findings are consistent with recent maternal deaths enquiries which have found poor  
16  
17 communication between maternity and mental health services to be a significant factor in many of  
18  
19 the mental health related deaths.<sup>(16)</sup> In particular, the 2017 MBRRACE report highlighted that a  
20  
21 narrow interpretation of risk (e.g. that focused on a woman's current symptom presentation)  
22  
23 resulted in an under recognition and treatment of women with mental illness.<sup>(17)</sup> Healthcare  
24  
25 communication is a complex process and this study emphasises the important influence of how signs  
26  
27 of mental illness are interpreted and communicated, which was strongly embedded within HCP  
28  
29 training and experiences, confidence and professional cultures. In order to improve communication  
30  
31 between primary and mental healthcare professionals there is a clear need to adopt strategies that  
32  
33 target such cultural factors and help facilitate communication between teams.  
34  
35  
36

37  
38 Clinical guidelines in the UK recommend the use of two questions ('the Whooley questions') to aid  
39  
40 identification of depression and other mental illnesses during pregnancy and the early postnatal  
41  
42 period.<sup>(13)</sup> Several previous studies have highlighted barriers to implementing these assessments in  
43  
44 practice, such as time constraints and lack of training and knowledge about perinatal mental  
45  
46 health.<sup>(18)</sup> The present study suggests that the implementation of routine questions to identify  
47  
48 mental illness may be more complex within the current healthcare system. For example, lack of on-  
49  
50 going assessment of women's mental health throughout the perinatal period reduced the ability to  
51  
52 identify significant changes in symptom presentation. Furthermore, challenges in interpreting  
53  
54 responses to the questions arose from a lack of continuity of care and unclear thresholds and  
55  
56  
57  
58  
59  
60

## Life-threatening situations in women with perinatal mental illness

1  
2  
3 pathways of referral, which created uncertainty among healthcare professionals about the  
4  
5 appropriate treatment response.  
6  
7

8 Under-resourced mental health service provision further contributed to women not being assessed  
9  
10 by a specialist within an adequate time-frame. A shortage of services for moderate mental illness  
11  
12 led to primary care staff monitoring and managing the care of women they perceived to require  
13  
14 greater support, creating confusion about referral thresholds. Lack of perinatal mental health  
15  
16 services in the UK is well-documented,<sup>(19)</sup> and recent government investments aim to increase access  
17  
18 by 30,000 women by 2021.<sup>(20)</sup> However, In addition to a lack of specialist services, HCP emphasised  
19  
20 several other barriers, which included both healthcare level factors (e.g. a reluctance to prescribe  
21  
22 medication or admit women to mental health hospitals during pregnancy or early post-birth) and  
23  
24 patient and family level factors (e.g. stigma and missed appointments).  
25  
26  
27

28  
29 This is the first study to explore maternal near misses or life-threatening situations among women  
30  
31 with perinatal mental illnesses. Interviews with a range of professionals involved in women's  
32  
33 antenatal and postnatal care allowed us to compare the views of different HCP and the impact that  
34  
35 this had on recognition and response. Although several previous studies have explored experiences  
36  
37 of care among women with perinatal mental illness,<sup>(21-23)</sup> none have distinguished between women  
38  
39 with high-risk mental illness, requiring rapid assessment and escalation and those with mild-  
40  
41 moderate mental illness. This is important since differing levels of risk and severity require different  
42  
43 communication strategies and treatment response. Failure to objectively differentiate between  
44  
45 levels of risk and severity in mental health literature is likely to further compound the challenges  
46  
47 highlighted in this study.  
48  
49

50  
51  
52 However, there are some study limitations that require consideration. This is a small qualitative  
53  
54 study of HCP in the UK, which may not be generalizable to other settings. Importantly, women's  
55  
56 perspectives are not explored within this study. Given the sensitive nature of the topic, future  
57  
58  
59  
60

## Life-threatening situations in women with perinatal mental illness

1  
2  
3 research should be co-designed with women, and families, with experience of mental illness to  
4  
5 adopt appropriate and sensitive research methods.  
6  
7

8 Furthermore, the utility and applicability of the concept of clinical deterioration and access to timely  
9  
10 care, as proposed by the 'three delay model' of maternal mortality, requires further consideration  
11  
12 within the context of psychiatric near miss events, since not all psychiatric maternal near misses will  
13  
14 occur within the context of clinical deterioration. As highlighted by several healthcare professionals,  
15  
16 an absence of reliable and dynamic methods of risk assessment impeded their ability to predict  
17  
18 those at most risk of a life-threatening event. This is supported by a recent meta-analysis of risk  
19  
20 scales, which demonstrated the predictive power of such scales on future suicidal behaviours was  
21  
22 too low to advocate their use.<sup>(24)</sup> Instead, a focus on individual needs based assessments and  
23  
24 modifiable risk factors is recommended.<sup>(24, 25)</sup>  
25  
26  
27  
28

29 In conclusion, barriers to response and escalation of mental healthcare for women life-threatening  
30  
31 perinatal mental illness are strongly influenced by the professional culture and understanding of  
32  
33 mental illness embedded within different healthcare disciplines. A lack of consensus about what  
34  
35 constitutes a psychiatric maternal near miss resulted in discrepancies in reporting, recording and  
36  
37 learning from such events. There are several clinical implications arising from this study, which  
38  
39 emphasis the need for greater implementation of recommendations made by MBRRACE and the  
40  
41 National Institute for Health and Care Excellence (NICE),<sup>(2, 13)</sup> see Box 1.  
42  
43  
44  
45  
46  
47  
48  
49  
50  
51  
52  
53  
54  
55  
56  
57  
58  
59  
60

**Box 1: Key Implications for Practice**

Based on the findings of this study, and existing NICE guidance and recommendations from the UK maternal deaths enquiry, <sup>(2, 15)</sup> the following recommendations aim to improve the detection and response to life-threatening situations among women with mental illness:

1. **Clear referral thresholds and pathway** – greater clarity and consensus, between all healthcare professionals involved in providing care for perinatal women, about the thresholds and pathways for referral to secondary mental health services during the perinatal period.
2. **Transparent information sharing** – Improved methods of information sharing between primary care, maternity, mental health teams and social services, which use a common language relating to mental health risk.
3. **Ensure continuity of care when possible** – greater implementation of continuity of care models for all healthcare professionals involved in a woman's care during the perinatal period, which clearly state the roles, responsibilities, and plans for dedicated care coordination.
4. **Regular monitoring of women's mental health** – training and support for primary and maternity healthcare professionals around regular monitoring of mental health at all appointments (e.g. when assessing physical health, mental health should also be assessed) to promote dynamic risk assessment and rapid response to deterioration.

To prevent future tragedies, there is a need for greater clarity and consensus about thresholds for referral to secondary mental health services and the role of Midwives and Health Visitors in monitoring women's mental health during the perinatal period. Focusing on how differences in organisational and professional culture contribute to the recognition of severe mental illness and

## Life-threatening situations in women with perinatal mental illness

1  
2  
3 inter-disciplinary communication may help facilitate clearer co-ordination between teams in the  
4  
5 future.  
6  
7  
8  
9

10  
11 **Funding:** Dr Easter is funded through a King's Improvement Science Fellowship award. King's  
12  
13 Improvement Science is part of the NIHR CLAHRC South London and comprises a specialist team of  
14  
15 improvement scientists and senior researchers based at King's College London. Its work is funded by  
16  
17 King's Health Partners (Guy's and St Thomas' NHS Foundation Trust, King's College Hospital NHS  
18  
19 Foundation Trust, King's College London and South London and Maudsley NHS Foundation Trust),  
20  
21 Guy's and St Thomas' Charity, the Maudsley Charity and the Health Foundation. Prof Howard is  
22  
23 funded through a NIHR Research Professorship (NIHR-RP-R3-12-011) in Maternal Mental Health. Prof  
24  
25 Sandall CBE is an NIHR Senior Investigator. Dr Easter and Prof Sandall are supported by the National  
26  
27 Institute for Health Research (NIHR) Collaboration for Leadership in Applied Health Research and  
28  
29 Care South London at King's College Hospital NHS Foundation Trust. The views expressed are those  
30  
31 of the author(s) and not necessarily those of the NHS, the NIHR or the Department of Health and  
32  
33 Social Care.  
34  
35  
36  
37  
38

39 **Acknowledgements:** We would like to thank all healthcare professionals for dedicating their time to  
40  
41 this study and the Section of Women's Mental Health Perinatal Service User Advisory Group for their  
42  
43 contribution to this study.  
44  
45

46 **Competing Interests:** None  
47  
48

49 **Contribution to Authorship:** AE, LH and JS conceived and designed the current study. AE was  
50  
51 responsible for all data collection and primary data analysis; AE, LH and JS contributed to data  
52  
53 interpretation. AE drafted the article which was critically revised by all authors. All authors approved  
54  
55 the final version of the article to be published.  
56  
57  
58  
59  
60

## Life-threatening situations in women with perinatal mental illness

1  
2  
3 **Ethical Approval:** This study was reviewed and approved by King's College London Ethics Committee  
4  
5 (Psychiatry, Nursing and Midwifery Research Ethics Subcommittee); Research Ethics Committee  
6  
7 Reference LRS-16/17-3861 approval granted 12/12/16.  
8  
9

10 **Data sharing statement:** This is a qualitative study and therefore the data generated is not suitable  
11  
12 for sharing beyond that contained within the report. Further information can be obtained from the  
13  
14 corresponding author.  
15  
16

17  
18 **Figure 1: Overview of themes and sub-themes**  
19  
20  
21  
22  
23  
24  
25  
26  
27  
28  
29  
30  
31  
32  
33  
34  
35  
36  
37  
38  
39  
40  
41  
42  
43  
44  
45  
46  
47  
48  
49  
50  
51  
52  
53  
54  
55  
56  
57  
58  
59  
60

## References

1. Howard LM, Molyneaux E, Dennis C-L, Rochat T, Stein A, Milgrom J. Non-psychotic mental disorders in the perinatal period. *The Lancet*. 2014;384(9956):1775-88.
2. Knight M, Bunch K, Tuffnell D, Jayakody H, Shakespeare J, Kotnis R, et al. Saving Lives, Improving Mothers' Care - Lessons learned to inform maternity care from the UK and Ireland Confidential Enquiries into Maternal Deaths and Morbidity 2014-16. University of Oxford 2018; 2018.
3. World Health Organization. Evaluating the quality of care for severe pregnancy complications: the WHO near-miss approach for maternal health. 2011.
4. Tunçalp Ö, Hindin MJ, Souza J, Chou D, Say L. The prevalence of maternal near miss: a systematic review. *BJOG: An International Journal of Obstetrics & Gynaecology*. 2012;119(6):653-61.
5. Royal College of Obstetricians and Gynaecologists. Patterns of maternity care in English NHS hospitals 2011/12: RCOG Press; 2013.
6. Nair M, Kurinczuk JJ, Knight M. Establishing a National Maternal Morbidity Outcome Indicator in England: A Population-Based Study Using Routine Hospital Data. *PloS one*. 2016;11(4):e0153370.
7. Easter A, Howard L, Sandall J. Mental health near miss indicators in maternity care: a missed opportunity? A Commentary. *BJOG: An International Journal of Obstetrics & Gynaecology*. 2017.
8. Braun V, Clarke V. Using thematic analysis in psychology. *Qualitative research in psychology*. 2006;3(2):77-101.
9. Fanjiang G, Grossman JH, Compton WD, Reid PP. Building a better delivery system: a new engineering/health care partnership: National Academies Press; 2005.
10. Thaddeus S, Maine D. Too far to walk: maternal mortality in context. *Social science & medicine*. 1994;38(8):1091-110.



## Life-threatening situations in women with perinatal mental illness

11. Gabrysch S, Campbell OM. Still too far to walk: literature review of the determinants of delivery service use. *BMC pregnancy and childbirth*. 2009;9(1):34.
12. O'Hara MW, Wisner KL. Perinatal mental illness: definition, description and aetiology. *Best Practice & Research Clinical Obstetrics & Gynaecology*. 2014;28(1):3-12.
13. Howard LM, Megnin-Viggars O, Symington I, Group GD. Antenatal and postnatal mental health: summary of updated NICE guidance. *BMJ*. 2014;349:g7394.
14. Oates M. Perinatal psychiatric disorders: a leading cause of maternal morbidity and mortality. *British medical bulletin*. 2003;67(1):219-29.
15. Knight M NM, Tuffnell D, Kenyon S, Shakespeare J, Brocklehurst P, Kurinczuk JJ Oxford: National Perinatal Epidemiology Unit, University of Oxford 2016. Saving Lives, Improving Mothers' Care - Surveillance of maternal deaths in the UK 2012-14 and lessons learned to inform maternity care from the UK and Ireland Confidential Enquiries into Maternal Deaths and Morbidity 2009-14. 2015.
16. Knight M, Kenyon S, Brocklehurst P, Neilson J, Shakespeare J, Kurinczuk J. Saving Lives, Improving Mothers' Care Lessons learned to inform future maternity care from the UK and Ireland Confidential Enquiries into Maternal Deaths and Morbidity 2009-2012. 2014.
17. Knight M, Nair M, Tuffnell D, Shakespeare J, Kenyon S, Kurinczuk J. Saving Lives, Improving Mothers' Care Lessons learned to inform future maternity care from the UK and Ireland Confidential Enquiries into Maternal Deaths and Morbidity 2013-2015. Oxford: National Perinatal Epidemiology Unit, University of Oxford 2017.
18. Littlewood E, Ali S, Dyson L, Keding A, Ansell P, Bailey D, et al. Identifying perinatal depression with case-finding instruments: a mixed-methods study (BaBY PaNDA—Born and Bred in Yorkshire PeriNatal Depression Diagnostic Accuracy). *Health Services and Delivery Research*. 2018.
19. Bauer A, Parsonage M, Knapp M, Lemmi V, Adelaja B. Costs of perinatal mental health problems. 2014.
20. NHS England. 2017 [Available from: <https://www.england.nhs.uk/mental-health/perinatal/>].

## Life-threatening situations in women with perinatal mental illness

- 1  
2  
3 21. Button S, Thornton A, Lee S, Shakespeare J, Ayers S. Seeking help for perinatal psychological  
4 distress: a meta-synthesis of women's experiences. Br J Gen Pract. 2017:bjgp17X692549.  
5  
6  
7 22. Megnin-Viggars O, Symington I, Howard LM, Pilling S. Experience of care for mental health  
8 problems in the antenatal or postnatal period for women in the UK: a systematic review and meta-  
9 synthesis of qualitative research. Archives of women's mental health. 2015;18(6):745-59.  
10  
11  
12  
13  
14 23. Dennis CL, Chung-Lee L. Postpartum depression help-seeking barriers and maternal  
15 treatment preferences: A qualitative systematic review. Birth. 2006;33(4):323-31.  
16  
17  
18 24. Carter G, Milner A, McGill K, Pirkis J, Kapur N, Spittal MJ. Predicting suicidal behaviours using  
19 clinical instruments: systematic review and meta-analysis of positive predictive values for risk scales.  
20 The British Journal of Psychiatry. 2017:bjp. bp. 116.182717.  
21  
22  
23  
24  
25 25. National Institute for Health and Care Excellence. NICE Guidelines Self-Harm: Longer Term  
26 Management (CG 133). NICE; 2011.  
27  
28  
29  
30  
31  
32  
33  
34  
35  
36  
37  
38  
39  
40  
41  
42  
43  
44  
45  
46  
47  
48  
49  
50  
51  
52  
53  
54  
55  
56  
57  
58  
59  
60



Figure 1: Overview of themes and sub-themes

## Standards for Reporting Qualitative Research (SRQR)\*

<http://www.equator-network.org/reporting-guidelines/srqr/>

Page/line no(s).

### Title and abstract

|                                                                                                                                                                                                                                                              |                   |
|--------------------------------------------------------------------------------------------------------------------------------------------------------------------------------------------------------------------------------------------------------------|-------------------|
| <p><b>Title</b> - Concise description of the nature and topic of the study Identifying the study as qualitative or indicating the approach (e.g., ethnography, grounded theory) or data collection methods (e.g., interview, focus group) is recommended</p> | Page 1/Line 3     |
| <p><b>Abstract</b> - Summary of key elements of the study using the abstract format of the intended publication; typically includes background, purpose, methods, results, and conclusions</p>                                                               | Page 2/Lines 6-56 |

### Introduction

|                                                                                                                                                                     |                    |
|---------------------------------------------------------------------------------------------------------------------------------------------------------------------|--------------------|
| <p><b>Problem formulation</b> - Description and significance of the problem/phenomenon studied; review of relevant theory and empirical work; problem statement</p> | Page 4/Lines 6-41  |
| <p><b>Purpose or research question</b> – Purpose of the study and specific objectives or questions</p>                                                              | Page 4/Lines 39-41 |

### Methods

|                                                                                                                                                                                                                                                                                                                                                                                                             |                                                               |
|-------------------------------------------------------------------------------------------------------------------------------------------------------------------------------------------------------------------------------------------------------------------------------------------------------------------------------------------------------------------------------------------------------------|---------------------------------------------------------------|
| <p><b>Qualitative approach and research paradigm</b> - Qualitative approach (e.g., ethnography, grounded theory, case study, phenomenology, narrative research) and guiding theory if appropriate; identifying the research paradigm (e.g., postpositivist, constructivist/ interpretivist) is also recommended; rationale**</p>                                                                            | Page 4/Lines 50-54<br>Page 5/Lines 40-51<br>Page 6 lines 6-27 |
| <p><b>Researcher characteristics and reflexivity</b> - Researchers' characteristics that may influence the research, including personal attributes, qualifications/experience, relationship with participants, assumptions, and/or presuppositions; potential or actual interaction between researchers' characteristics and the research questions, approach, methods, results, and/or transferability</p> | Page 6/Lines 30-38                                            |
| <p><b>Context</b> - Setting/site and salient contextual factors; rationale**</p>                                                                                                                                                                                                                                                                                                                            | Page 5/Lines 6-17                                             |
| <p><b>Sampling strategy</b> - How and why research participants, documents, or events were selected; criteria for deciding when no further sampling was necessary (e.g., sampling saturation); rationale**</p>                                                                                                                                                                                              | Page 5 /Lines 3-18                                            |
| <p><b>Ethical issues pertaining to human subjects</b> - Documentation of approval by an appropriate ethics review board and participant consent, or explanation for lack thereof; other confidentiality and data security issues</p>                                                                                                                                                                        | Page 5/Lines 20-30                                            |
| <p><b>Data collection methods</b> - Types of data collected; details of data collection procedures including (as appropriate) start and stop dates of data collection and analysis, iterative process, triangulation of sources/methods, and modification of procedures in response to evolving study findings; rationale**</p>                                                                             | Page 5/Lines 40-51                                            |

|                       |                                                                                                                                                                                                                                                       |                                         |
|-----------------------|-------------------------------------------------------------------------------------------------------------------------------------------------------------------------------------------------------------------------------------------------------|-----------------------------------------|
| 1<br>2<br>3<br>4<br>5 | <b>Data collection instruments and technologies</b> - Description of instruments (e.g., interview guides, questionnaires) and devices (e.g., audio recorders) used for data collection; if/how the instrument(s) changed over the course of the study | Page 5/ Lines 40-51                     |
| 6<br>7<br>8           | <b>Units of study</b> - Number and relevant characteristics of participants, documents, or events included in the study; level of participation (could be reported in results)                                                                        | Page 7/Lines 9-50 (Table 1)             |
| 9<br>10<br>11<br>12   | <b>Data processing</b> - Methods for processing data prior to and during analysis, including transcription, data entry, data management and security, verification of data integrity, data coding, and anonymization/de-identification of excerpts    | Page 6/Lines 6-38                       |
| 13<br>14<br>15<br>16  | <b>Data analysis</b> - Process by which inferences, themes, etc., were identified and developed, including the researchers involved in data analysis; usually references a specific paradigm or approach; rationale**                                 | Page 6/Lines 6-38                       |
| 17<br>18<br>19<br>20  | <b>Techniques to enhance trustworthiness</b> - Techniques to enhance trustworthiness and credibility of data analysis (e.g., member checking, audit trail, triangulation); rationale**                                                                | Page 5/Lines 6-16<br>Page 6/Lines 30-38 |

## Results/findings

|                                        |                                                                                                                                                                                                   |                         |
|----------------------------------------|---------------------------------------------------------------------------------------------------------------------------------------------------------------------------------------------------|-------------------------|
| 21<br>22<br>23<br>24<br>25<br>26<br>27 | <b>Synthesis and interpretation</b> - Main findings (e.g., interpretations, inferences, and themes); might include development of a theory or model, or integration with prior research or theory | Pages 15-22<br>Figure 1 |
| 28<br>29<br>30                         | <b>Links to empirical data</b> - Evidence (e.g., quotes, field notes, text excerpts, photographs) to substantiate analytic findings                                                               | Pages 8-13              |

## Discussion

|                                              |                                                                                                                                                                                                                                                                                                                                                                                                             |                                          |
|----------------------------------------------|-------------------------------------------------------------------------------------------------------------------------------------------------------------------------------------------------------------------------------------------------------------------------------------------------------------------------------------------------------------------------------------------------------------|------------------------------------------|
| 31<br>32<br>33<br>34<br>35<br>36<br>37<br>38 | <b>Integration with prior work, implications, transferability, and contribution(s) to the field</b> - Short summary of main findings; explanation of how findings and conclusions connect to, support, elaborate on, or challenge conclusions of earlier scholarship; discussion of scope of application/generalizability; identification of unique contribution(s) to scholarship in a discipline or field | Page 14 Lines 42-55<br>Page 15 line 3-42 |
| 39<br>40<br>41<br>42<br>43                   | <b>Limitations</b> - Trustworthiness and limitations of findings                                                                                                                                                                                                                                                                                                                                            | Page 15/Line 45-56<br>Page 16/Lines 3-38 |

## Other

|                            |                                                                                                                                               |                     |
|----------------------------|-----------------------------------------------------------------------------------------------------------------------------------------------|---------------------|
| 44<br>45<br>46<br>47<br>48 | <b>Conflicts of interest</b> - Potential sources of influence or perceived influence on study conduct and conclusions; how these were managed | Page 17/Lines 42    |
| 49<br>50                   | <b>Funding</b> - Sources of funding and other support; role of funders in data collection, interpretation, and reporting                      | Page 17/Lines 11-32 |

\*The authors created the SRQR by searching the literature to identify guidelines, reporting standards, and critical appraisal criteria for qualitative research; reviewing the reference lists of retrieved sources; and contacting experts to gain feedback. The SRQR aims to improve the transparency of all aspects of qualitative research by providing clear standards for reporting qualitative research.

1  
2  
3 \*\*The rationale should briefly discuss the justification for choosing that theory, approach,  
4 method, or technique rather than other options available, the assumptions and limitations  
5 implicit in those choices, and how those choices influence study conclusions and  
6 transferability. As appropriate, the rationale for several items might be discussed together.  
7

8 **Reference:**

9 O'Brien BC, Harris IB, Beckman TJ, Reed DA, Cook DA. **Standards for reporting qualitative**  
10 **research: a synthesis of recommendations.** *Academic Medicine*, Vol. 89, No. 9 / Sept 2014  
11 DOI: [10.1097/ACM.0000000000000388](https://doi.org/10.1097/ACM.0000000000000388)  
12  
13  
14  
15  
16  
17  
18  
19  
20  
21  
22  
23  
24  
25  
26  
27  
28  
29  
30  
31  
32  
33  
34  
35  
36  
37  
38  
39  
40  
41  
42  
43  
44  
45  
46  
47  
48  
49  
50  
51  
52  
53  
54  
55  
56  
57  
58  
59  
60

For peer review only
